# Supplementary material for: Chemical andin silicotuning of the magnetisation reversal barrier in pentagonal bipyramidal Dy(iii) single-ion magnets
Source: Royal Society of Chemistry journal article supplement (doi:10.1039/c8cc03929a), 2018-01-01
Supplement: c8cc03929a1.pdf [file c8cc03929a1.pdf]

## ELECTRONIC SUPPLEMENTARY INFORMATION

### **Chemical and *in silico* tuning of the magnetisation reversal barrier in pentagonal bipyramidal Dy(III) single-ion magnets**

Angelos B. Canaj,<sup>a</sup> Mukesh Kumar Singh<sup>b</sup>, Claire Wilson<sup>a</sup>, Gopalan Rajaraman\*<sup>b</sup> and Mark Murrie\*<sup>a</sup>

<sup>a</sup> WestCHEM, School of Chemistry, University of Glasgow, University Avenue, Glasgow, G12 8QQ, UK. E-mail: Mark.Murrie@glasgow.ac.uk

<sup>b</sup> Department of Chemistry, Indian Institute of Technology Bombay, Powai, Mumbai, Maharashtra, 400076, India. E-mail: rajaraman@chem.iitb.ac.in

## Materials and physical measurements

All manipulations were performed under aerobic conditions, using materials as received. Elemental analyses (C, H, N) were performed by the University of Glasgow microanalysis service. Variable-temperature, solid-state direct current (dc) magnetic susceptibility data down to 2.0 K were collected on a Quantum Design MPMS-XL SQUID magnetometer equipped with a 5 T DC magnet at the University of Glasgow. Polycrystalline samples were embedded in eicosane and diamagnetic corrections were applied to the observed paramagnetic susceptibilities using Pascal's constants. Powder XRD measurements were collected on freshly prepared samples of **1**, **2**, **1@Y** and **2@Y** on a PANalytical X'Pert Pro MPD diffractometer ( $\lambda$  (CuK $\alpha_1$ ) = 1.4505 Å) on a mounted bracket sample stage, at the University of Glasgow. Single Crystal X-Ray diffraction data were collected using a Bruker D8 VENTURE diffractometer equipped with a Photon II CMOS detector, with an Oxford Cryosystems N-Helix device mounted on an I $\mu$ S 3.0 (dual Cu and Mo) microfocus sealed tube generator at the University of Glasgow.

## Synthesis

### *Synthetic strategy applicable to 1-4:*

Hexamethylphosphoramide (306 mg, 1.7 mmol) was added to 10 ml of hot THF. After 30 minutes,  $\text{DyCl}_3 \cdot 6\text{H}_2\text{O}$  (113 mg, 0.3 mmol), was added to give a colourless solution. After stirring for 2 hours, the solution was evaporated to dryness and the precipitate formed was dissolved in a mixture of DCM/Toluene (1:1) and was left for slow evaporation. After ~ 3 days colourless single crystals of  $[\text{Dy}(\text{H}_2\text{O})_5(\text{HMPA})_2]\text{Cl}_3 \cdot \text{HMPA} \cdot \text{H}_2\text{O}$  (**1**) were isolated. For  $[\text{Dy}(\text{H}_2\text{O})_5(\text{HMPA})_2]\text{I}_3 \cdot 2\text{HMPA}$  (**2**),  $[\text{Y}(\text{H}_2\text{O})_5(\text{HMPA})_2]\text{Cl}_3 \cdot \text{HMPA} \cdot \text{H}_2\text{O}$  (**3**) and  $[\text{Y}(\text{H}_2\text{O})_5(\text{HMPA})_2]\text{I}_3 \cdot 2\text{HMPA}$  (**4**), exactly the same procedure was followed as in the case of **1**, with the use of  $\text{DyI}_3$  (163 mg, 0.3 mmol),  $\text{YCl}_3 \cdot 6\text{H}_2\text{O}$  (91 mg, 0.3 mmol) or  $\text{YI}_3$  (141 mg, 0.3 mmol) respectively. Typical yields of compounds **1-4** are 30-35%.

Elemental Anal. calcd (found) for **1**· $\text{H}_2\text{O}$ : C 23.64 (23.48), H 7.27 (7.28), N 13.78 (13.45) %. **2**: C 21.35 (21.41), H 6.12 (6.10), N 12.45 (12.35) %. **3**: C 25.70 (25.71), H 7.91 (7.91), N 14.96 (14.99) %. **4**: C 22.58 (22.90), H 6.48 (6.44), N 13.17 (12.90) %.

### *Synthetic strategy applicable to 1@Y:*

The same procedure was followed as in the case of **1** with the use of hexamethylphosphoramide (1026 mg, 5.7 mmol),  $\text{DyCl}_3 \cdot 6\text{H}_2\text{O}$  (19 mg, 0.05 mmol) and  $\text{YCl}_3 \cdot 6\text{H}_2\text{O}$  (288 mg, 0.95 mmol).

Elemental Anal. calcd (found) for **1**@**Y**· $\text{H}_2\text{O}$ : C 25.71 (25.72), H 7.91 (7.93), N 14.99 (14.53) %.

### *Synthetic strategy applicable to 2@Y:*

The same procedure was followed as in the case of **2** with the use of hexamethylphosphoramide (1026 mg, 5.7 mmol),  $\text{DyI}_3$  (27 mg, 0.05 mmol) and  $\text{YI}_3$  (447 mg, 0.95 mmol).

Elemental Anal. calcd (found) for **2**@**Y**·0.5 $\text{H}_2\text{O}$ : C 22.58 (23.03), H 6.48 (7.12), N 13.17 (13.09) %.

## Single-Crystal X-ray Diffraction

Selected details of the single crystal X-ray diffraction studies of **1-4** are provided below. More complete details are provided in the deposited CIFs (CCDC 1835322-1835325). In all cases one HMPA ligand shows some disorder, details of the disorder modelling are provided in the CIFs.

Data collection: *APEX3* Ver. 2016.9-0 (Bruker-AXS, 2016); cell refinement: *SAINT* v8.37A (Bruker, 2015); data reduction: *SAINT* v8.37A (Bruker, 2015); program(s) used to solve structure: SHELXT (Sheldrick, 2015); program(s) used to refine structure: SHELXL (Sheldrick, 2008); within Olex2 (Dolomanov *et al.*, 2009).<sup>1,2,3</sup>

**Table S1.** Crystallographic data for complexes **1** and **2**.

|                                          | <b>1</b>                                                                                       | <b>2</b>                                                                                       |
|------------------------------------------|------------------------------------------------------------------------------------------------|------------------------------------------------------------------------------------------------|
| Formula                                  | C <sub>18</sub> H <sub>66</sub> Cl <sub>3</sub> DyN <sub>9</sub> O <sub>9</sub> P <sub>3</sub> | C <sub>24</sub> H <sub>82</sub> DyI <sub>3</sub> N <sub>12</sub> O <sub>9</sub> P <sub>4</sub> |
| <i>M<sub>w</sub></i>                     | 914.55                                                                                         | 1350.09                                                                                        |
| Crystal System                           | Monoclinic                                                                                     | Monoclinic                                                                                     |
| Space group                              | <i>P</i> 2 <sub>1</sub> / <i>c</i>                                                             | <i>Cc</i>                                                                                      |
| <i>a</i> /Å                              | 11.3237 (10)                                                                                   | 14.0512 (7)                                                                                    |
| <i>b</i> /Å                              | 38.167 (4)                                                                                     | 19.1355 (10)                                                                                   |
| <i>c</i> /Å                              | 19.4676 (18)                                                                                   | 20.4829 (11)                                                                                   |
| $\alpha$ /°                              | 90                                                                                             | 90                                                                                             |
| $\beta$ /°                               | 101.025 (3)                                                                                    | 101.075 (2)                                                                                    |
| $\gamma$ /°                              | 90                                                                                             | 90                                                                                             |
| <i>V</i> /Å <sup>3</sup>                 | 8258.4 (13)                                                                                    | 5404.8 (5)                                                                                     |
| <i>Z</i>                                 | 8                                                                                              | 4                                                                                              |
| <i>T</i> /K                              | 100                                                                                            | 100                                                                                            |
| $\lambda$ /Å                             | 0.71073                                                                                        | 0.71073                                                                                        |
| <i>D<sub>c</sub></i> /g cm <sup>-3</sup> | 1.471                                                                                          | 1.659                                                                                          |
| $\mu$ (Mo-K $\alpha$ )/mm <sup>-1</sup>  | 2.17                                                                                           | 3.26                                                                                           |

|                                                       |                      |                     |
|-------------------------------------------------------|----------------------|---------------------|
| Meas./indep. ( $R_{\text{int}}$ ) refl.               | 97180 /18913 (0.033) | 24453/11023 (0.029) |
| Obs. refl. [ $I > 2\sigma(I)$ ]                       | 17718                | 10586               |
| $wR(F^2)$                                             | 0.054                | 0.054               |
| $R[F^2 > 2s(F^2)]$                                    | 0.025                | 0.024               |
| $S$                                                   | 1.15                 | 0.98                |
| $\Delta\rho_{\text{max,min}}/\text{e}\text{\AA}^{-3}$ | 0.90, -1.35          | 1.17, -0.66         |

**Table S2.** Crystallographic data for complexes **3** and **4**.

|                        | <b>3</b>                                                               | <b>4</b>                                                                 |
|------------------------|------------------------------------------------------------------------|--------------------------------------------------------------------------|
| Formula                | $\text{C}_{18}\text{H}_{66}\text{Cl}_3\text{YN}_9\text{O}_9\text{P}_3$ | $\text{C}_{24}\text{H}_{82}\text{Yl}_3\text{N}_{12}\text{O}_9\text{P}_4$ |
| $M_w$                  | 840.96                                                                 | 1276.50                                                                  |
| Crystal System         | Monoclinic                                                             | Monoclinic                                                               |
| Space group            | $P2_1/c$                                                               | Cc                                                                       |
| $a/\text{\AA}$         | 11.4154 (7)                                                            | 14.0960 (8)                                                              |
| $b/\text{\AA}$         | 38.613 (3)                                                             | 19.1099 (13)                                                             |
| $c/\text{\AA}$         | 19.9862 (13)                                                           | 20.5439 (13)                                                             |
| $\alpha/^\circ$        | 90                                                                     | 90                                                                       |
| $\beta/^\circ$         | 101.936 (3) $^\circ$                                                   | 101.091 (2)                                                              |
| $\gamma/^\circ$        | 90                                                                     | 90                                                                       |
| $V/\text{\AA}^3$       | 8619.2 (10)                                                            | 5430.6 (6)                                                               |
| $Z$                    | 8                                                                      | 4                                                                        |
| $T/\text{K}$           | 298                                                                    | 295                                                                      |
| $\lambda/\text{\AA}$   | 0.71073                                                                | 0.71073 $\text{\AA}$                                                     |
| $D_c/\text{g cm}^{-3}$ | 1.296                                                                  | 1.561                                                                    |

|                                                       |                    |                    |
|-------------------------------------------------------|--------------------|--------------------|
| $\mu(\text{Mo-K}\alpha)/\text{mm}^{-1}$               | 1.70               | 2.95               |
| Meas./indep. ( $R_{\text{int}}$ )<br>refl.            | 94898/19662(0.054) | 52651/12236(0.086) |
| Obs. refl. [ $I > 2\sigma(I)$ ]                       | 13854              | 10497              |
| $wR(F^2)$                                             | 0.123              | 0.056              |
| $R[F^2 > 2s(F^2)]$                                    | 0.047              | 0.029              |
| $S$                                                   | 1.02               | 1.04               |
| $\Delta\rho_{\text{max,min}}/\text{e}\text{\AA}^{-3}$ | 0.70, -0.49        | 0.57, -0.87        |

**Table S2.** Selected bond distances and angles for complex **1** ( $\text{\AA}$ ,  $^\circ$ ).

|             |             |              |             |
|-------------|-------------|--------------|-------------|
| Dy1—O3      | 2.2171 (14) | Dy1—O8W      | 2.3600 (16) |
| Dy1—O4      | 2.2211 (14) | Dy1—O9W      | 2.3433 (16) |
| Dy1—O6W     | 2.3474 (16) | Dy1—O10W     | 2.3576 (16) |
| Dy1—O7W     | 2.3377 (16) |              |             |
|             |             |              |             |
| O3—Dy1—O4   | 175.58 (6)  | O6W—Dy1—O10W | 71.85 (6)   |
| O3—Dy1—O6W  | 93.38 (6)   | O7W—Dy1—O6W  | 71.85 (6)   |
| O3—Dy1—O7W  | 90.13 (6)   | O7W—Dy1—O8W  | 72.63 (6)   |
| O3—Dy1—O8W  | 89.73 (6)   | O7W—Dy1—O9W  | 144.53 (7)  |
| O3—Dy1—O9W  | 87.50 (6)   | O7W—Dy1—O10W | 143.21 (6)  |
| O3—Dy1—O10W | 86.19 (6)   | O9W—Dy1—O6W  | 143.62 (6)  |
| O4—Dy1—O6W  | 89.78 (6)   | O9W—Dy1—O8W  | 71.97 (6)   |
| O4—Dy1—O7W  | 93.80 (6)   | O9W—Dy1—O10W | 71.93 (6)   |
| O4—Dy1—O8W  | 89.50 (6)   | O10W—Dy1—O8W | 143.80 (6)  |
| O4—Dy1—O9W  | 88.12 (6)   | O4—Dy1—O10W  | 91.86 (6)   |

|             |             |             |             |
|-------------|-------------|-------------|-------------|
| O6W—Dy1—O8W | 144.34 (6)  |             |             |
|             |             |             |             |
| Dy2—O1      | 2.2282 (15) | Dy2—O2W     | 2.3587 (17) |
| Dy2—O1W     | 2.3586 (16) | Dy2—O3W     | 2.3465 (17) |
| Dy2—O2      | 2.2096 (15) | Dy2—O4W     | 2.3386 (17) |
| Dy2—O5W     | 2.3365 (16) |             |             |
|             |             |             |             |
| O1—Dy2—O1W  | 90.67 (6)   | O2—Dy2—O3W  | 87.38 (7)   |
| O1—Dy2—O2W  | 86.05 (6)   | O2—Dy2—O4W  | 91.00 (6)   |
| O1—Dy2—O3W  | 95.79 (6)   | O2—Dy2—O5W  | 90.12 (6)   |
| O1—Dy2—O4W  | 89.12 (6)   | O3W—Dy2—O1W | 143.43 (7)  |
| O1—Dy2—O5W  | 86.78 (6)   | O3W—Dy2—O2W | 72.05 (7)   |
| O1W—Dy2—O2W | 72.56 (7)   | O4W—Dy2—O1W | 143.89 (6)  |
| O2—Dy2—O1   | 176.71 (6)  | O4W—Dy2—O2W | 143.35 (7)  |
| O2—Dy2—O1W  | 87.29 (6)   | O4W—Dy2—O3W | 72.35 (7)   |
| O2—Dy2—O2W  | 95.79 (6)   | O5W—Dy2—O1W | 71.41 (6)   |
| O5W—Dy2—O2W | 143.12 (7)  | O5W—Dy2—O4W | 72.53 (6)   |
| O5W—Dy2—O3W | 144.73 (7)  |             |             |

**Table S3.** Selected bond distances and angles for complex **2** (Å, °).

|           |             |             |            |
|-----------|-------------|-------------|------------|
| Dy1—O1    | 2.202 (4)   | Dy1—O3W     | 2.343 (4)  |
| Dy1—O2    | 2.208 (4)   | Dy1—O4W     | 2.364 (4)  |
| Dy1—O1W   | 2.375 (4)   | Dy1—O5W     | 2.359 (4)  |
| Dy1—O2W   | 2.357 (4)   |             |            |
|           |             |             |            |
| O1—Dy1—O2 | 177.95 (16) | O2W—Dy1—O1W | 73.00 (14) |

|            |            |             |             |
|------------|------------|-------------|-------------|
| O1—Dy1—O1W | 89.28 (14) | O2W—Dy1—O4W | 142.07 (14) |
| O1—Dy1—O2W | 89.41 (16) | O2W—Dy1—O5W | 146.17 (13) |
| O1—Dy1—O3W | 89.18 (15) | O3W—Dy1—O1W | 144.26 (14) |
| O1—Dy1—O4W | 92.92 (16) | O3W—Dy1—O2W | 71.28 (14)  |
| O1—Dy1—O5W | 90.45 (16) | O3W—Dy1—O4W | 70.91 (14)  |
| O2—Dy1—O1W | 89.15 (14) | O3W—Dy1—O5W | 142.55 (14) |
| O2—Dy1—O2W | 88.88 (17) | O4W—Dy1—O1W | 144.82 (14) |
| O2—Dy1—O3W | 91.34 (15) | O5W—Dy1—O1W | 73.18 (14)  |
| O2—Dy1—O4W | 89.12 (16) | O5W—Dy1—O4W | 71.71 (14)  |
| O2—Dy1—O5W | 90.35 (16) |             |             |
|            |            |             |             |

**Table S4.** Shape measures of complex **1**. The lowest CShMs value, is highlighted.<sup>4</sup>

|               | <b>Dy1 (1a)</b> | <b>Symmetry</b> | <b>Ideal polyhedron</b>                 |
|---------------|-----------------|-----------------|-----------------------------------------|
| HP-7          | 34.323          | D7h             | Heptagon                                |
| HPY-7         | 25.016          | C6v             | Hexagonal pyramid                       |
| <b>PBPY-7</b> | <b>0.154</b>    | <b>D5h</b>      | <b>Pentagonal bipyramid</b>             |
| COC-7         | 7.242           | C3v             | Capped octahedron                       |
| CTPR-7        | 5.574           | C2v             | Capped trigonal prism                   |
| JPBPY-7       | 2.809           | D5h             | Johnson pentagonal bipyramid J13        |
| JETPY-7       | 24.125          | C3v             | Johnson elongated triangular pyramid J7 |
|               |                 |                 |                                         |



|               | <b>Dy2 (1b)</b> | <b>Symmetry</b> | <b>Ideal polyhedron</b>                 |
|---------------|-----------------|-----------------|-----------------------------------------|
| HP-7          | 34.232          | D7h             | Heptagon                                |
| HPY-7         | 25.430          | C6v             | Hexagonal pyramid                       |
| <b>PBPY-7</b> | <b>0.284</b>    | <b>D5h</b>      | <b>Pentagonal bipyramid</b>             |
| COC-7         | 6.547           | C3v             | Capped octahedron                       |
| CTPR-7        | 4.797           | C2v             | Capped trigonal prism                   |
| JPBPY-7       | 2.964           | D5h             | Johnson pentagonal bipyramid J13        |
| JETPY-7       | 23.336          | C3v             | Johnson elongated triangular pyramid J7 |

**Table S5.** Shape measures of complex **2**.

|               | <b>Dy</b>    | <b>Symmetry</b> | <b>Ideal polyhedron</b>                    |
|---------------|--------------|-----------------|--------------------------------------------|
| HP-7          | 34.315       | D7h             | Heptagon                                   |
| HPY-7         | 25.127       | C6v             | Hexagonal pyramid                          |
| <b>PBPY-7</b> | <b>0.131</b> | <b>D5h</b>      | <b>Pentagonal<br/>bipyramid</b>            |
| COC-7         | 7.780        | C3v             | Capped octahedron                          |
| CTPR-7        | 5.911        | C2v             | Capped trigonal prism                      |
| JPBPY-7       | 2.617        | D5h             | Johnson pentagonal<br>bipyramid J13        |
| JETPY-7       | 24.592       | C3v             | Johnson elongated<br>triangular pyramid J7 |

**Table S6.** CASSCF+RASSI-SO computed relative energies (*in cm<sup>-1</sup>*) of eight low lying Kramer's Doublets along with g tensors and deviations from the principal magnetization axes with respect to first KD for complexes **1** (Unit **1a** *top* and unit **1b** *middle*) and **2** (*bottom*). Note: Complex **1** has two crystallographic units (**1a** and **1b**) and calculations have been performed on both units.

| <b>E / cm<sup>-1</sup></b> | <b>g<sub>xx</sub></b> | <b>g<sub>yy</sub></b> | <b>g<sub>zz</sub></b> | <b>Angle / °</b> |
|----------------------------|-----------------------|-----------------------|-----------------------|------------------|
| 0.00                       | 0.000                 | 0.000                 | 19.988                |                  |
| 298.50                     | 0.008                 | 0.011                 | 17.126                | 0.8              |
| 409.51                     | 0.685                 | 2.474                 | 17.710                | 89.4             |
| 468.87                     | 8.380                 | 6.312                 | 3.821                 | 3.6              |
| 498.15                     | 0.221                 | 0.380                 | 13.131                | 4.5              |
| 532.20                     | 0.455                 | 2.593                 | 8.066                 | 24.4             |
| 595.18                     | 8.836                 | 6.022                 | 2.126                 | 111.0            |
| 604.83                     | 10.917                | 7.319                 | 1.527                 | 57.6             |

| <b>E / cm<sup>-1</sup></b> | <b>g<sub>xx</sub></b> | <b>g<sub>yy</sub></b> | <b>g<sub>zz</sub></b> | <b>Angle / °</b> |
|----------------------------|-----------------------|-----------------------|-----------------------|------------------|
| 0.00                       | 0.000                 | 0.000                 | 19.959                |                  |
| 294.37                     | 0.011                 | 0.015                 | 17.061                | 1.6              |
| 405.67                     | 0.581                 | 1.856                 | 18.143                | 91.8             |
| 469.85                     | 3.754                 | 6.002                 | 8.851                 | 108.4            |
| 495.13                     | 1.464                 | 1.948                 | 11.357                | 9.3              |
| 539.49                     | 0.642                 | 2.177                 | 8.478                 | 20.4             |
| 593.13                     | 0.611                 | 2.237                 | 15.222                | 49.3             |
| 613.14                     | 0.235                 | 0.878                 | 17.241                | 54.1             |

| E / cm <sup>-1</sup> | g <sub>xx</sub> | g <sub>yy</sub> | g <sub>zz</sub> | Angle / ° |
|----------------------|-----------------|-----------------|-----------------|-----------|
| 0.00                 | 0.000           | 0.000           | 19.971          |           |
| 307.76               | 0.023           | 0.024           | 17.116          | 1.7       |
| 444.69               | 11.777          | 9.309           | 1.320           | 0.8       |
| 488.88               | 0.858           | 1.561           | 4.192           | 11.4      |
| 519.43               | 0.014           | 0.437           | 13.556          | 3.8       |
| 563.86               | 2.008           | 2.679           | 7.436           | 14.2      |
| 616.90               | 1.362           | 1.777           | 11.961          | 30.9      |
| 638.69               | 0.566           | 0.879           | 15.136          | 45.7      |

**Table S7** *Ab initio* SINGLE\_ANISO computed crystal field parameters for complexes **1** and **2**. Complex **2** has larger crystal field than **1**. Note: Complex **1** has two crystallographic units (**1a** and **1b**) and calculations have been performed on both units.

Here, k - the rank of the ITO, = 2, 4, 6, 8, 10, 12.

q - the component of the ITO, = -k, -k+1, ... 0, 1, ... k;

$K_m^n$  are proportionality coefficients between the ESO and operators. The non-axial term ( $B_k^q$ , where  $q \neq 0$  and  $k = 2, 4$ , and  $6$ ) to the axial term ( $B_k^q$ , where  $q = 0$  and  $k = 2, 4$ , and  $6$ ) ratio should be smaller for lesser operational QTM and larger  $U_{cal}$  value.

| k | q  | $K_m^n$ | Complexes |           |          |
|---|----|---------|-----------|-----------|----------|
|   |    |         | $B_k^q$   |           |          |
|   |    |         | <b>1a</b> | <b>1b</b> | <b>2</b> |
| 2 | -2 | 1.5     | -0.27     | 0.76      | 0.00     |
| 2 | -1 | 6.0     | -0.26     | 0.02      | 0.51     |
| 2 | 0  | 1.0     | -2.43     | -2.24     | -2.58    |
| 2 | 1  | 6.0     | -0.06     | -0.39     | 0.24     |
| 2 | 2  | 1.5     | 0.65      | 0.30      | 0.08     |

**Table S8** *Ab initio* SINGLE\_ANISO computed crystal field parameters for different models created by defragmentation of complexes **1b** and **2** (**1b** top and **2** bottom). For more details, see Fig. S28 and Fig. S29. Note: Complex **1** has two crystallographic units (**1a** and **1b**) and the anisotropy properties for both units of complex **1** are expected to be practically identical, as seen from magnetic blockade diagrams (Figure S29), so we have performed defragmentation only on unit **1b**. A smaller ratio of the non-axial term ( $B_k^q$ , where  $q \neq 0$  and  $k = 2, 4$ , and  $6$ ) to the axial term ( $B_k^q$ , where  $q = 0$  and  $k = 2, 4$ , and  $6$ ) is needed for lesser operational QTM. Removal of transverse anions/ligand-component cause lowering of the non-axial term ( $B_k^q$ , where  $q \neq 0$  and  $k = 2, 4$ , and  $6$ ) to the axial term ( $B_k^q$ , where  $q = 0$  and  $k = 2, 4$ , and  $6$ ) ratio and decrease operational QTM. The smallest ratio is found for the two coordinated linear models (**1b**-(1-12) and **2**-(1-10)), resulting in a very large  $U_{cal}$  value of ~3100 K.

| Complex 1 |    |           |             |                  |                  |                  |                  |                  |                  |                  |                  |                   |                   |                   |           |
|-----------|----|-----------|-------------|------------------|------------------|------------------|------------------|------------------|------------------|------------------|------------------|-------------------|-------------------|-------------------|-----------|
| k         | q  | $B_k^q$   |             |                  |                  |                  |                  |                  |                  |                  |                  |                   |                   |                   |           |
|           |    | <b>1b</b> | <b>1b-1</b> | <b>1b</b> -(1-2) | <b>1b</b> -(1-3) | <b>1b</b> -(1-4) | <b>1b</b> -(1-5) | <b>1b</b> -(1-6) | <b>1b</b> -(1-7) | <b>1b</b> -(1-8) | <b>1b</b> -(1-9) | <b>1b</b> -(1-10) | <b>1b</b> -(1-11) | <b>1b</b> -(1-12) | <b>1a</b> |
| 2         | -2 | 0.76      | 0.70        | 0.72             | 0.86             | 0.15             | -0.63            | -0.05            | 0.32             | 0.27             | -0.04            | 2.90              | 0.02              | 0.11              | -0.27     |
| 2         | -1 | 0.02      | 0.16        | 0.15             | 0.20             | 0.30             | 0.12             | 0.14             | 0.84             | 0.05             | 0.98             | -0.34             | -0.10             | 0.25              | -0.26     |
| 2         | 0  | -2.44     | -2.72       | -2.67            | -3.20            | -3.68            | -4.75            | -5.51            | -6.90            | -8.53            | -10.04           | -11.74            | -13.44            | -6.49             | -2.43     |
| 2         | 1  | -0.39     | -0.35       | -0.36            | -0.37            | -0.38            | -0.25            | 0.07             | -1.10            | 0.50             | 0.43             | 0.14              | 0.04              | -0.05             | -0.06     |
| 2         | 2  | 0.30      | 0.79        | 0.68             | 1.01             | 0.49             | 0.58             | -0.26            | -0.19            | 0.16             | 11.37            | -4.31             | 0.18              | 0.00              | 0.65      |

| Complex 2 |    |          |            |                 |                 |                 |                 |                 |                 |                 |                 |                  |                  |
|-----------|----|----------|------------|-----------------|-----------------|-----------------|-----------------|-----------------|-----------------|-----------------|-----------------|------------------|------------------|
| k         | q  | $B_k^q$  |            |                 |                 |                 |                 |                 |                 |                 |                 |                  |                  |
|           |    | <b>2</b> | <b>2-1</b> | <b>2</b> -(1-2) | <b>2</b> -(1-3) | <b>2</b> -(1-4) | <b>2</b> -(1-5) | <b>2</b> -(1-6) | <b>2</b> -(1-7) | <b>2</b> -(1-8) | <b>2</b> -(1-9) | <b>2</b> -(1-10) | <b>2</b> -(1-11) |
| 2         | -2 | 0.00     | -0.02      | 0.03            | 0.14            | 0.44            | -0.02           | 0.32            | 0.27            | -0.04           | 2.90            | 0.02             | 0.11             |
| 2         | -1 | 0.51     | 0.37       | 0.10            | 0.35            | 0.34            | 0.17            | 0.84            | 0.05            | 0.98            | -0.34           | -0.10            | 0.25             |
| 2         | 0  | -2.58    | -3.09      | -3.69           | -4.34           | -5.01           | -5.68           | -6.90           | -8.53           | -10.04          | -11.74          | -13.44           | -6.49            |
| 2         | 1  | 0.24     | -0.33      | -0.57           | 0.29            | -0.30           | 0.54            | -1.10           | 0.50            | 0.43            | 0.14            | 0.04             | -0.05            |
| 2         | 2  | 0.08     | 0.44       | -0.54           | 0.20            | -0.43           | 0.08            | -0.19           | 0.16            | 11.37           | -4.31           | 0.18             | 0.00             |

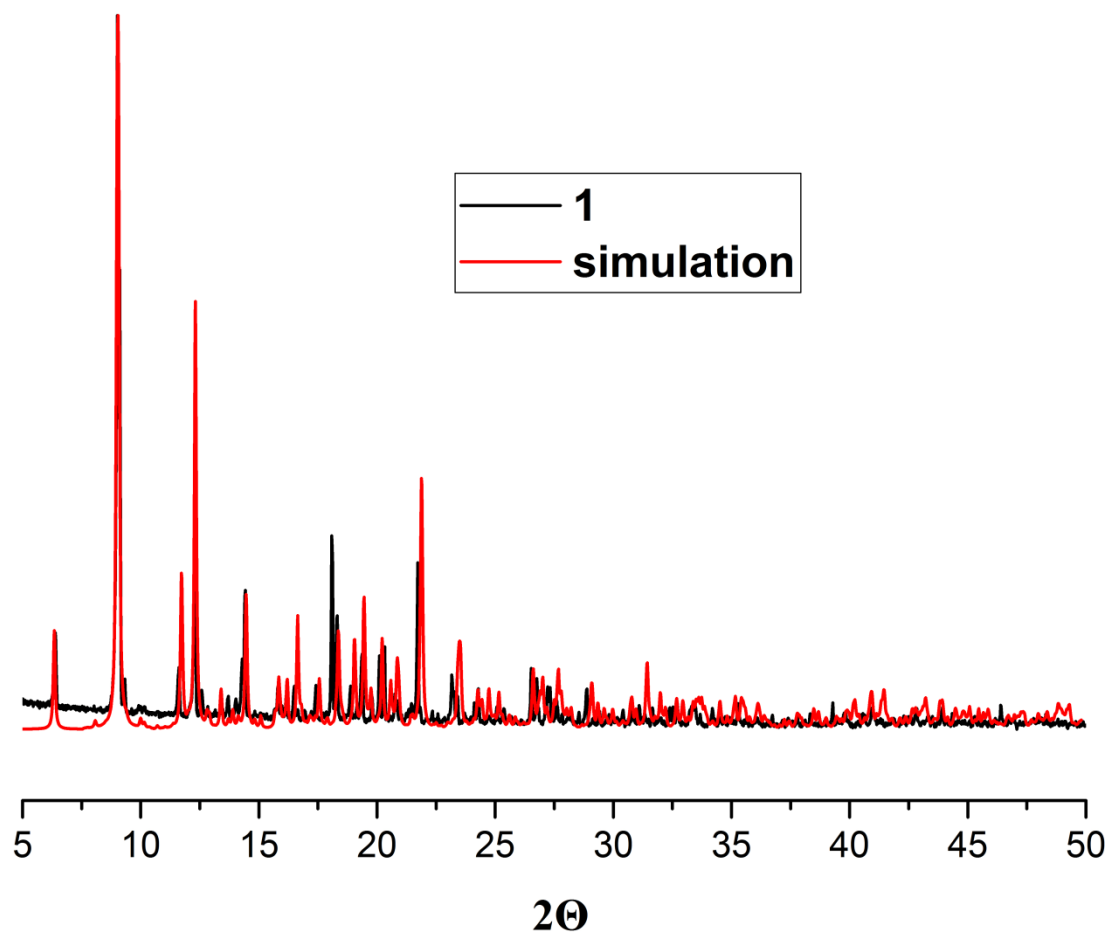

**Fig. S1** The powder X-ray diffraction pattern of **1**. The red line represents the simulated powder X-ray diffraction pattern generated from single-crystal data collected at 100 K, and the black line represents the experimental data measured at ambient temperature.

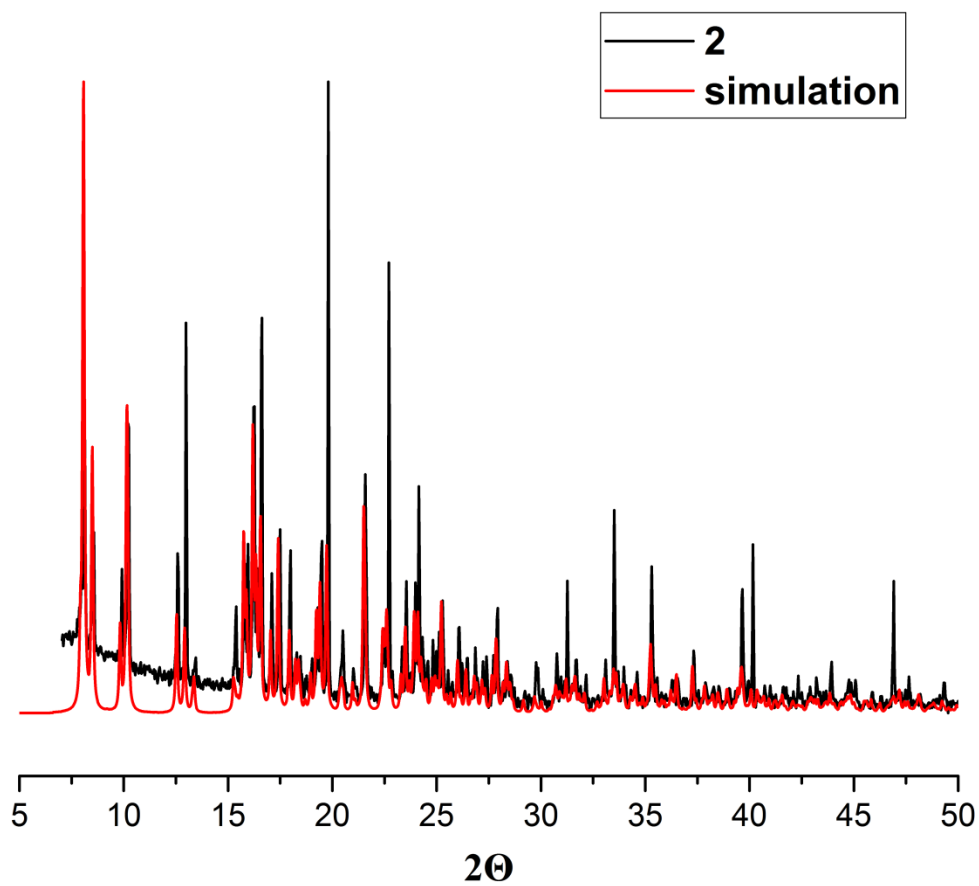

**Fig. S2** The powder X-ray diffraction pattern of **2**. The red line represents the simulated powder X-ray diffraction pattern generated from single-crystal data collected at 100 K, and the black line represents the experimental data measured at ambient temperature.

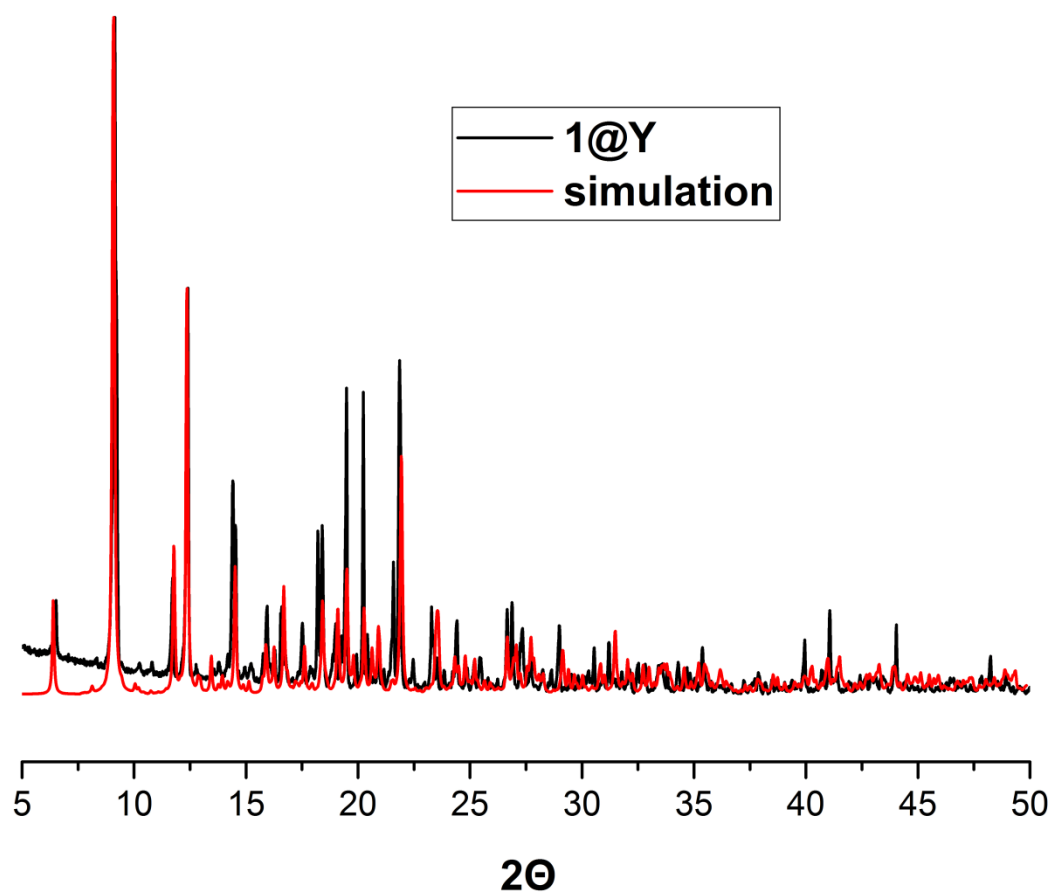

**Fig. S3** The experimental powder X-ray diffraction pattern of **1@Y**. The red line represents the simulated powder X-ray diffraction pattern of **1** generated from single-crystal data collected at 100 K, and the black line represents the experimental data measured at ambient temperature.



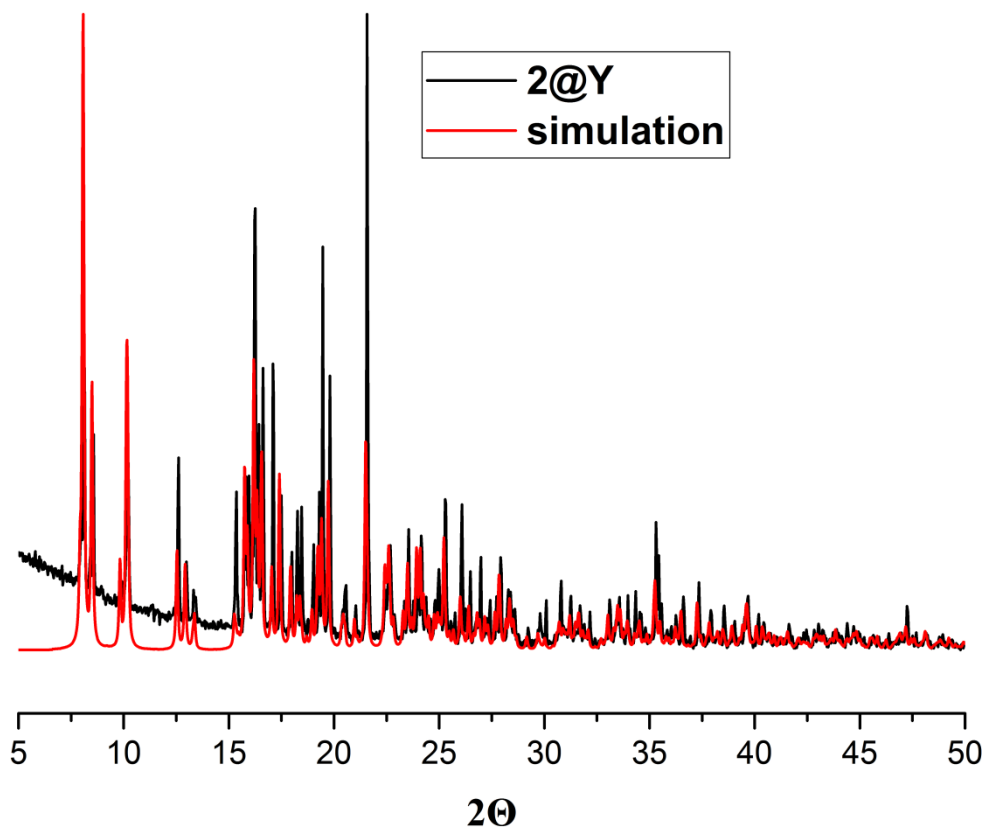

**Fig. S4** The experimental powder X-ray diffraction pattern of **2@Y**. The red line represents the simulated powder X-ray diffraction pattern of **2** generated from single-crystal data collected at 100 K, and the black line represents the experimental data measured at ambient temperature.

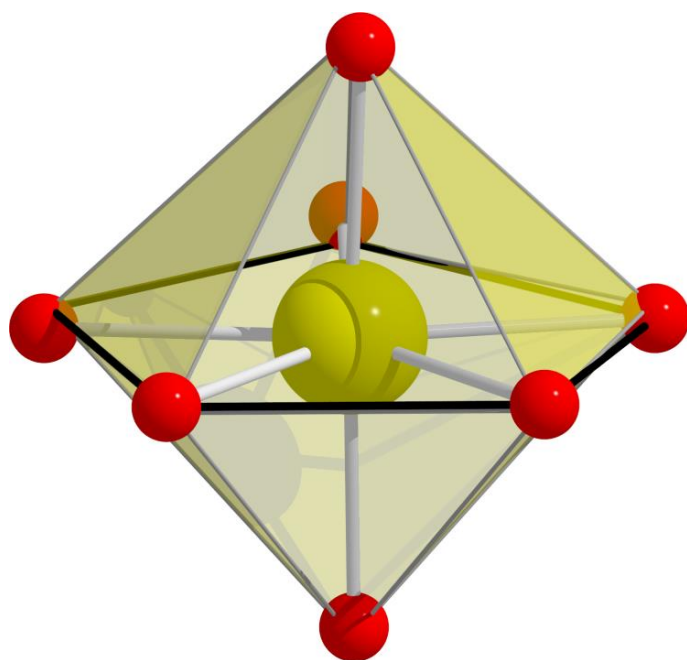

**Fig. S5** Comparison of the calculated (with SHAPE<sup>4</sup>) and experimental pentagonal bipyramidal coordination sphere for Dy(III) ions in complexes **1** and **2**.

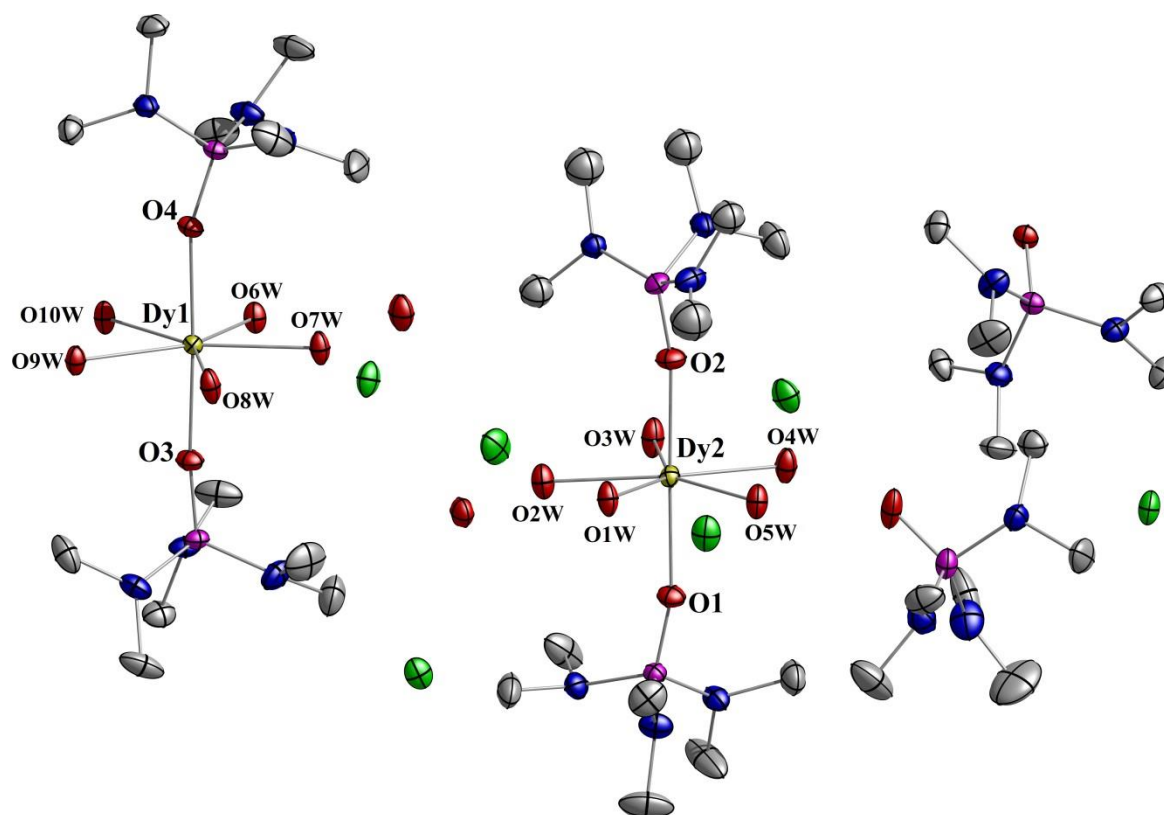

**Fig. S6** The asymmetric unit of **1**. Dy, gold; O, red; N, blue, P, pink; Cl, green. The displacement ellipsoids are drawn at 50% probability level. Hydrogen atoms and disorder components are omitted for clarity.

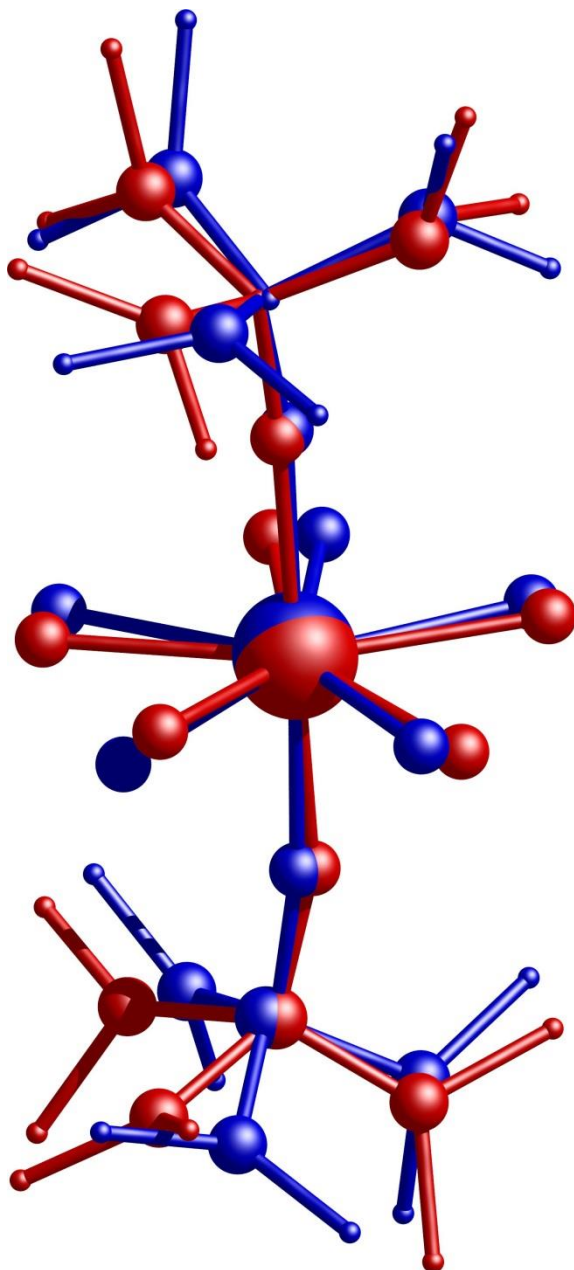

**Fig. S7** Overlay of the two Dy molecules present in the asymmetric unit of complex **1** (1a, red; 1b, blue). Hydrogen atom, disorder components, counter ions, co-crystallised solvent molecules and co-crystallised HMPA ligands are omitted for clarity.

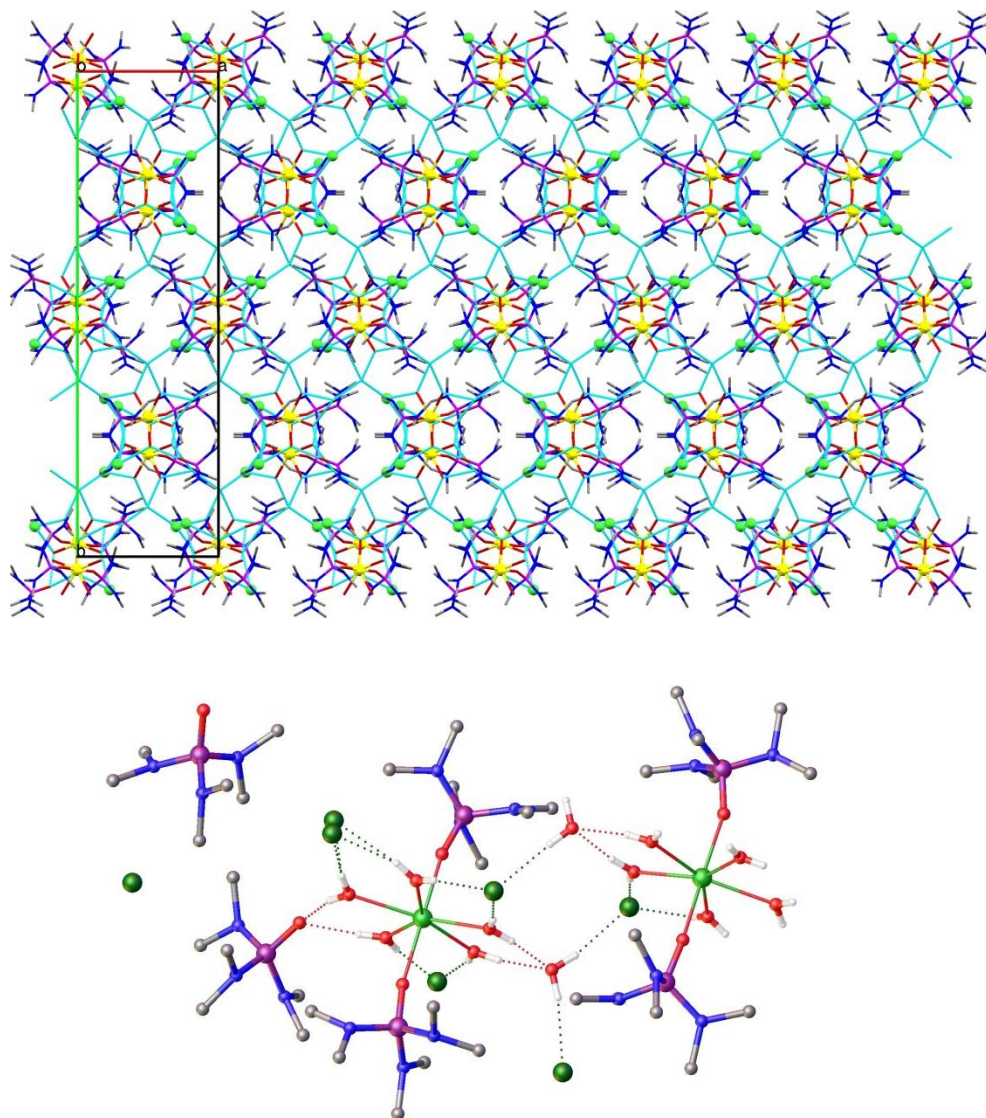

**Fig. S8** (Top) Crystal packing of **1** highlighting the extensive hydrogen bonding between the molecules (indicated in light blue). View shown is looking down the *c*-axis. Dy, yellow; P, orange; Cl, green; O, red; C, gray; N, blue. Hydrogen atoms are omitted for clarity. (Bottom) Illustrating the hydrogen bonding between the molecules in the asymmetric unit. All hydrogens except water H and the minor disorder components were omitted for clarity. Dy, green; P, violet; Cl, dark green; O, red; C, gray; N, blue.

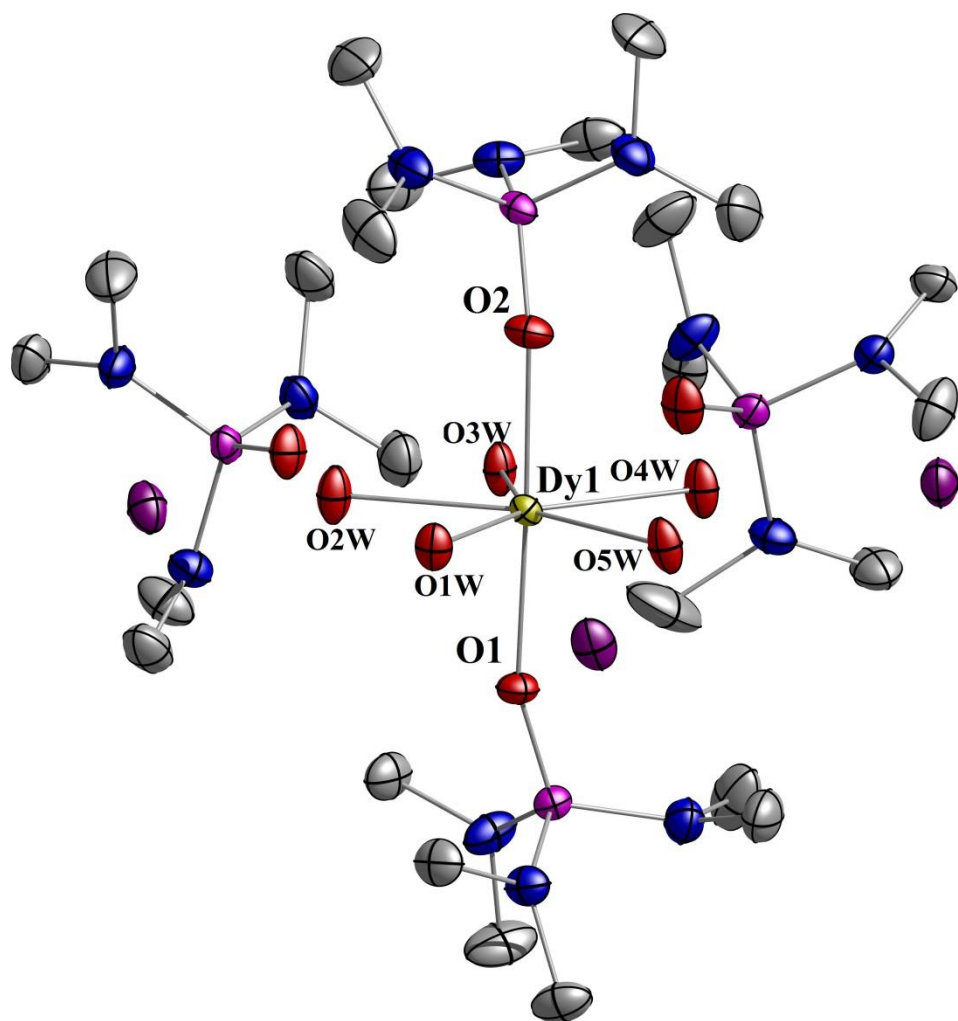

**Fig. S9** The structure of **2**. Dy, gold; O, red; N, blue, P, pink; I, violet. The displacement ellipsoids are drawn at 50% probability level. Hydrogen atoms and disorder components are omitted for clarity.

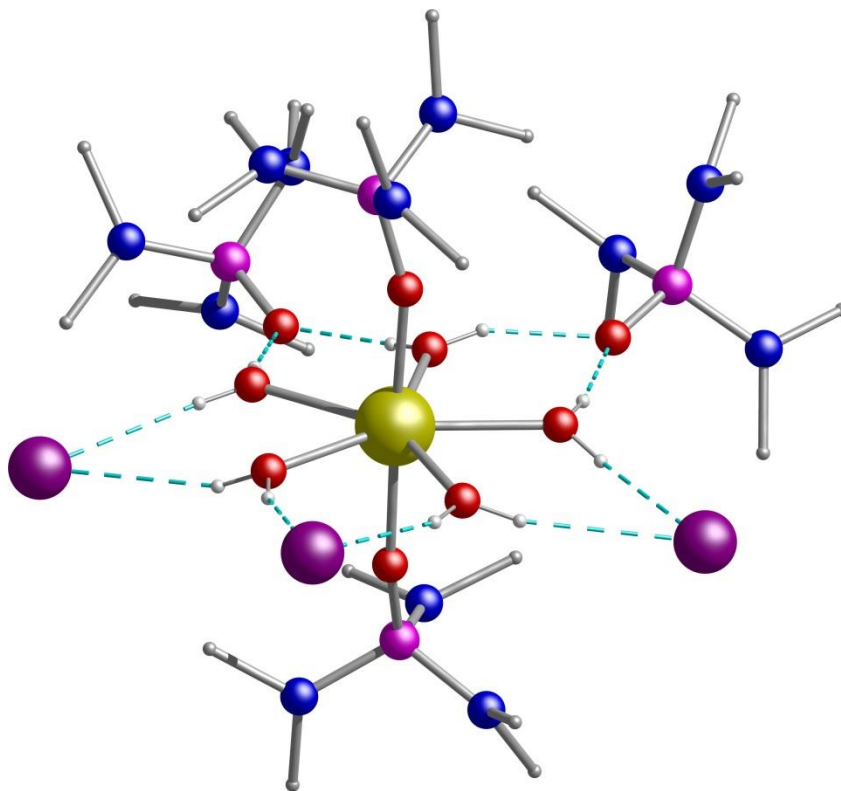

**Fig. S10** Hydrogen bonding in **2**. Dy, yellow; P, pink; I, violet; O, red; C, gray; N, blue. Hydrogen atoms are omitted for clarity except the H atoms of the equatorial water ligands.

## Magnetic Properties

### Dc magnetic susceptibility measurement and magnetization for complex 1

For **1** the dc magnetic susceptibility measurements were performed in 290-2 K temperature range under an applied magnetic field of 0.1 T plotted as  $\chi_M T$  vs. T in Fig. S10, with the isothermal magnetisation ( $M$  vs  $H$ ) shown in Fig. S10 (inset). The room temperature  $\chi_M T$  value of  $14.12 \text{ cm}^3 \text{ K mol}^{-1}$  is in agreement with the theoretical value of  $14.17 \text{ cm}^3 \text{ K mol}^{-1}$  expected for a mononuclear Dy (III) ion ( $^6\text{H}_{15/2}$ ,  $S = 5/2$ ,  $L = 5$ ,  $g = 4/3$ ). Upon cooling, the  $\chi_M T$  value of complex **1** gradually decreases to  $11.95 \text{ cm}^3 \text{ K mol}^{-1}$  at 6 K before rapidly dropping to the minimum value of  $4.81 \text{ cm}^3 \text{ K mol}^{-1}$  at 2 K.

### Dc magnetic susceptibility measurement for complex 2

For **2** the  $\chi_M T$  value of  $14.13 \text{ cm}^3 \text{ K mol}^{-1}$  at 290 K is close to the theoretical value of  $14.17 \text{ cm}^3 \text{ K mol}^{-1}$  calculated for one Dy(III) ion (Fig. S11). Upon cooling the temperature, a relatively imperceptible decrease of the  $\chi_M T$  is observed until 7 K following a more rapid decrease, reaching the value of  $4.28 \text{ cm}^3 \text{ K mol}^{-1}$  at 2 K.



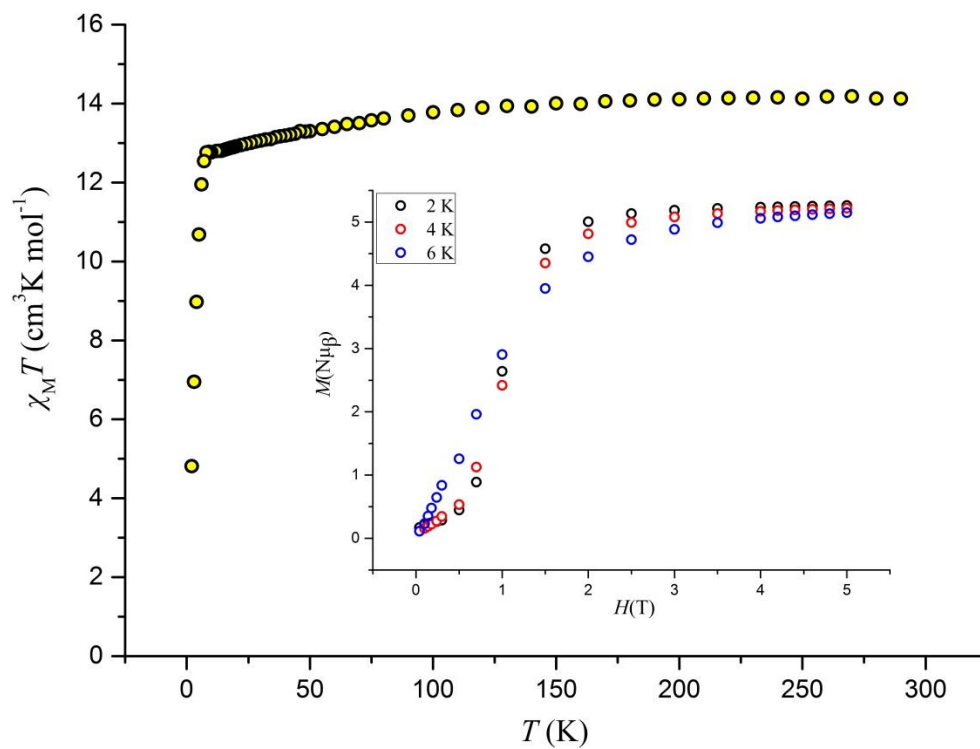

**Fig. S11**  $\chi_M T$  vs.  $T$  data for **1** in a field of 1000 Oe from 290 – 2 K. Inset: Magnetisation vs. Field plot at temperatures 2, 4 and 6 K for **1**.

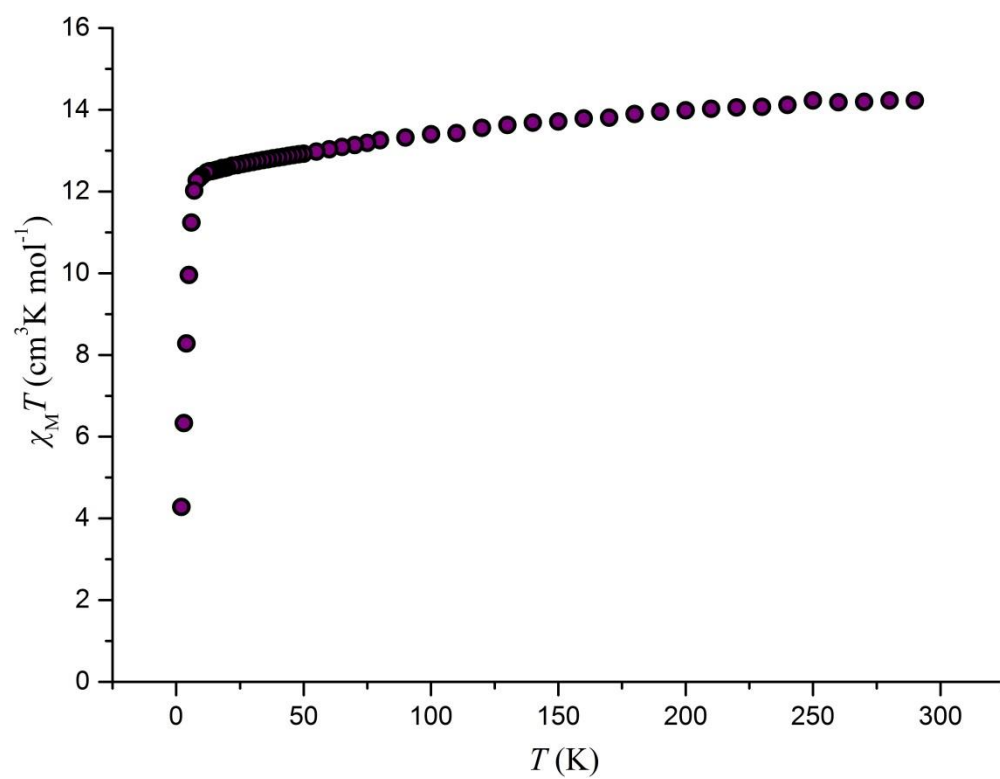

**Fig. S12**  $\chi_M T$  vs.  $T$  data for **2** in a field of 1000 Oe from 290 – 2 K.

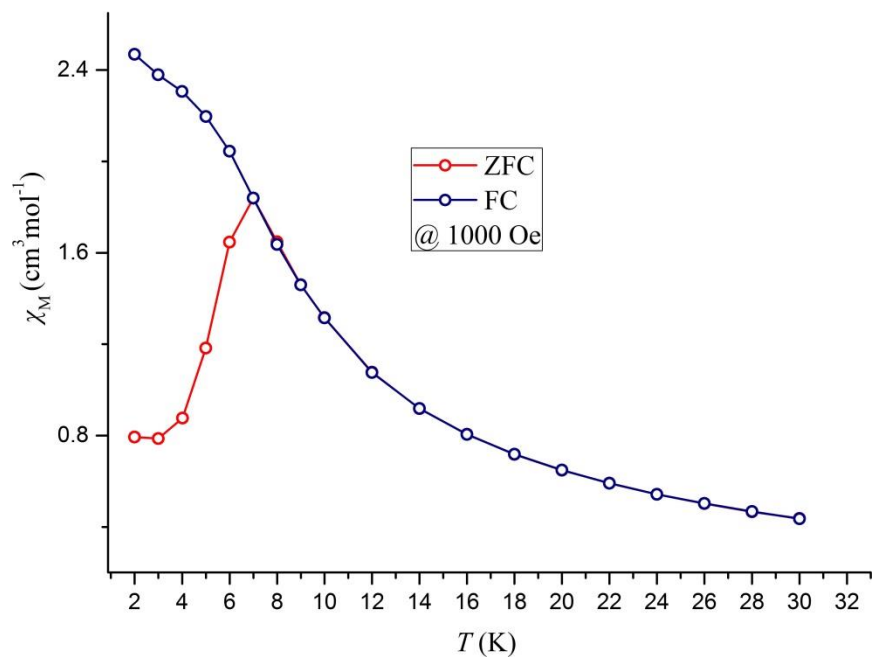

**Fig. S13** The Field cooled (FC) and Zero-Field cooled (ZFC) magnetic susceptibility of **1** at 1000 Oe.

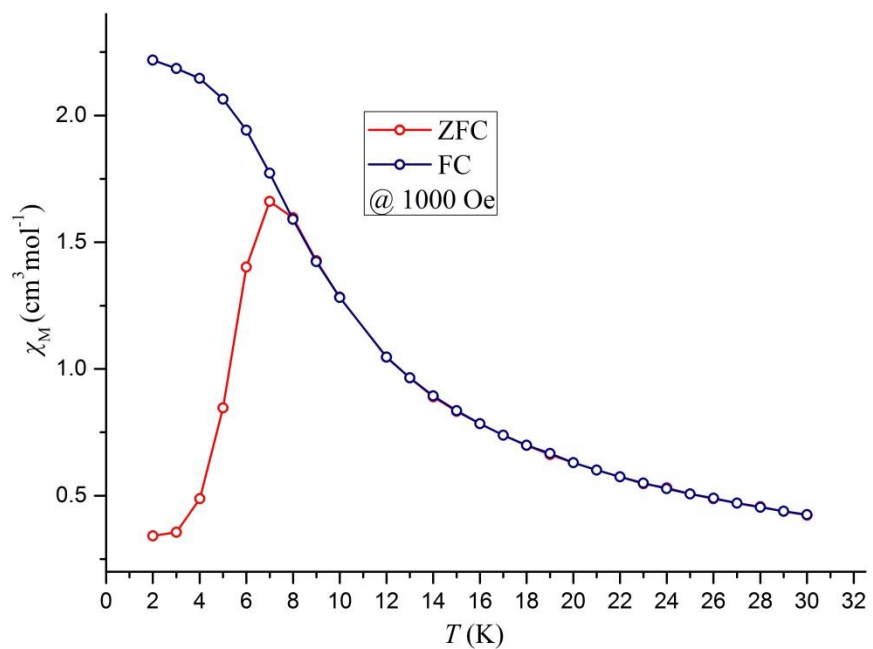

**Fig. S14** The Field cooled (FC) and Zero-Field cooled (ZFC) magnetic susceptibility of **2** at 1000 Oe.

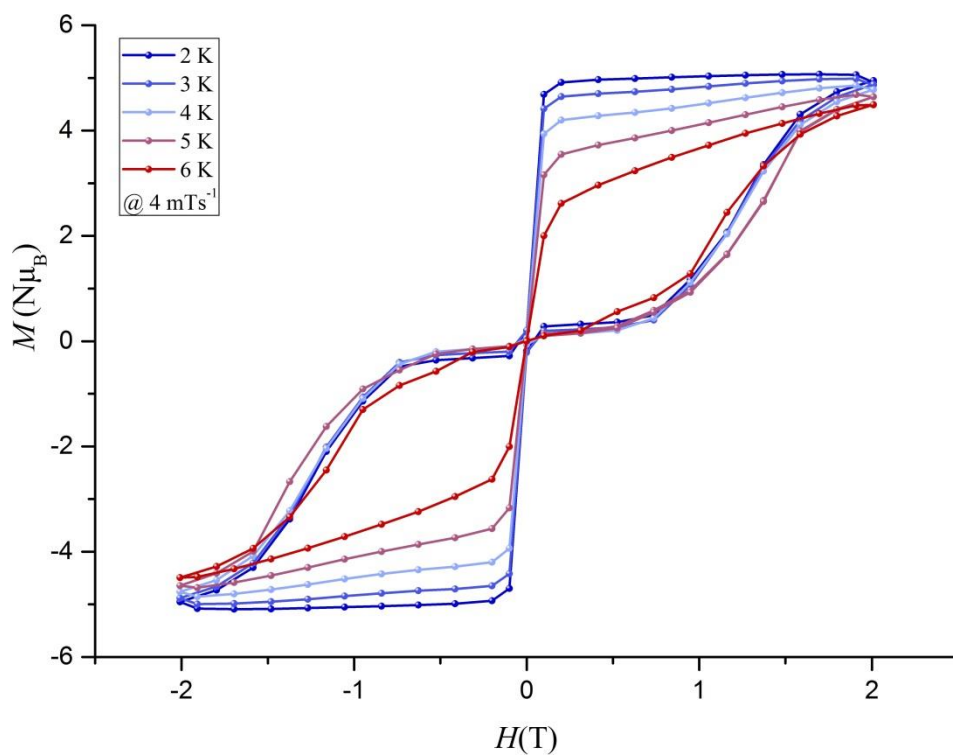

**Fig. S15** Magnetic hysteresis measurements for **1** at 2-6 K with an average sweep rate of 4 mTs<sup>-1</sup>

1.

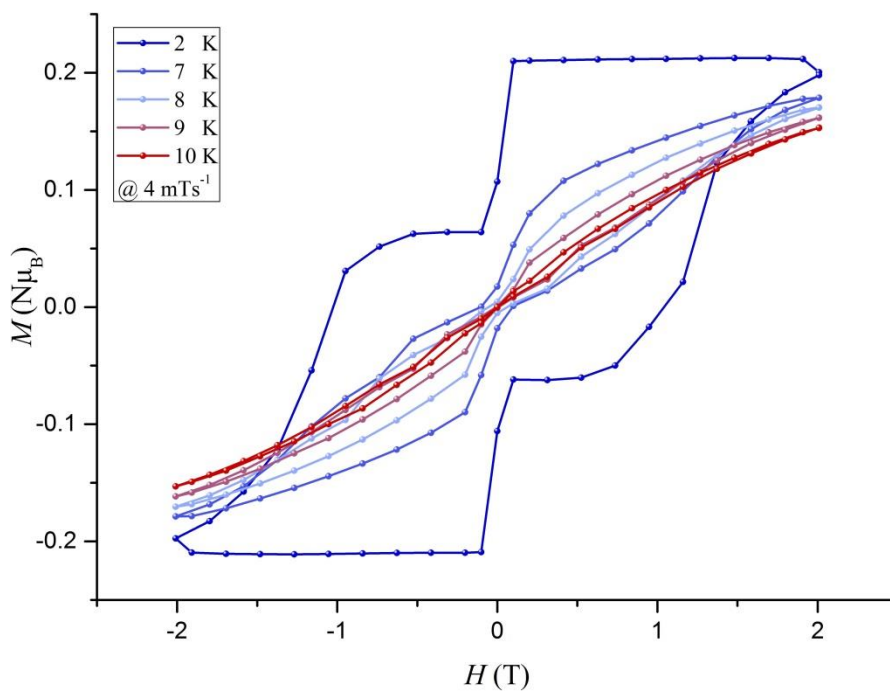

**Fig. S16** Magnetic hysteresis measurements for **1@Y** at 2-10 K with an average sweep rate of 4 mTs<sup>-1</sup>.

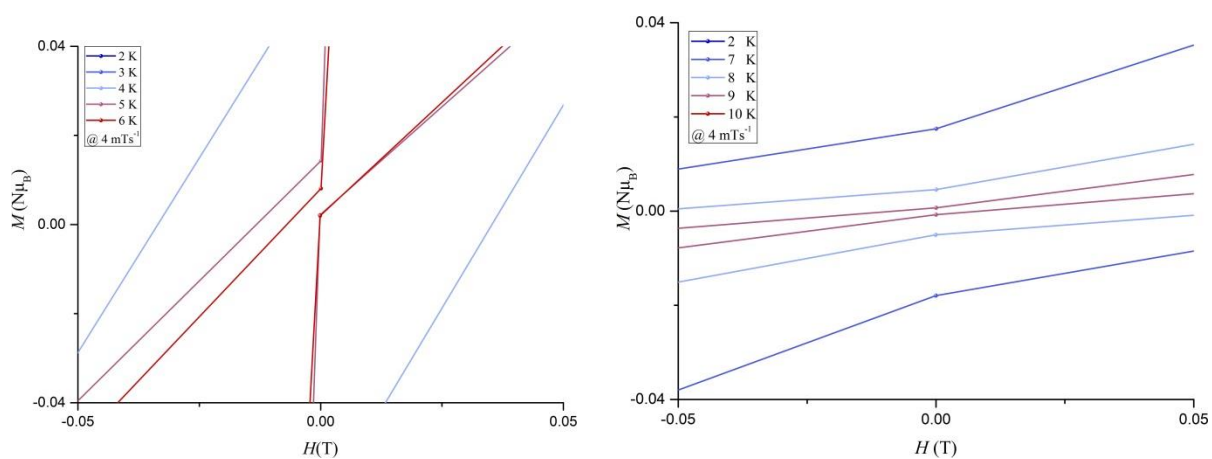

**Fig. S17** (Left) Magnetic hysteresis measurements for **1** remaining open until 6 K. (Right) Magnetic hysteresis measurements for **1@Y** which remains open until 9 K.

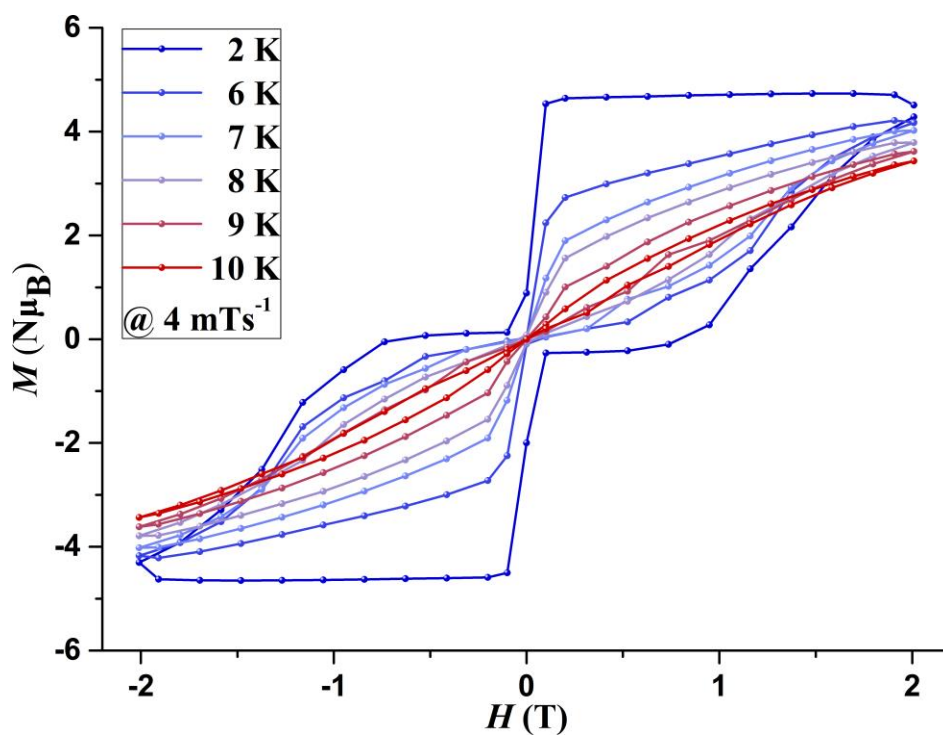

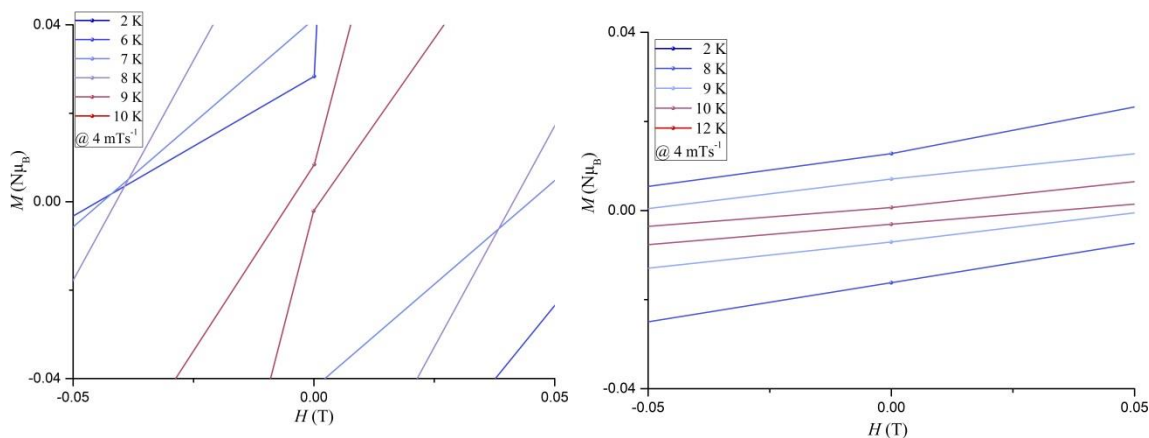

**Fig. S18** (Top) Magnetic hysteresis measurements for **2**. (Bottom left) Magnetic hysteresis measurements for **2** remaining open until 9 K. (Bottom right) Magnetic hysteresis measurements for **2@Y** which remains open until 10 K.

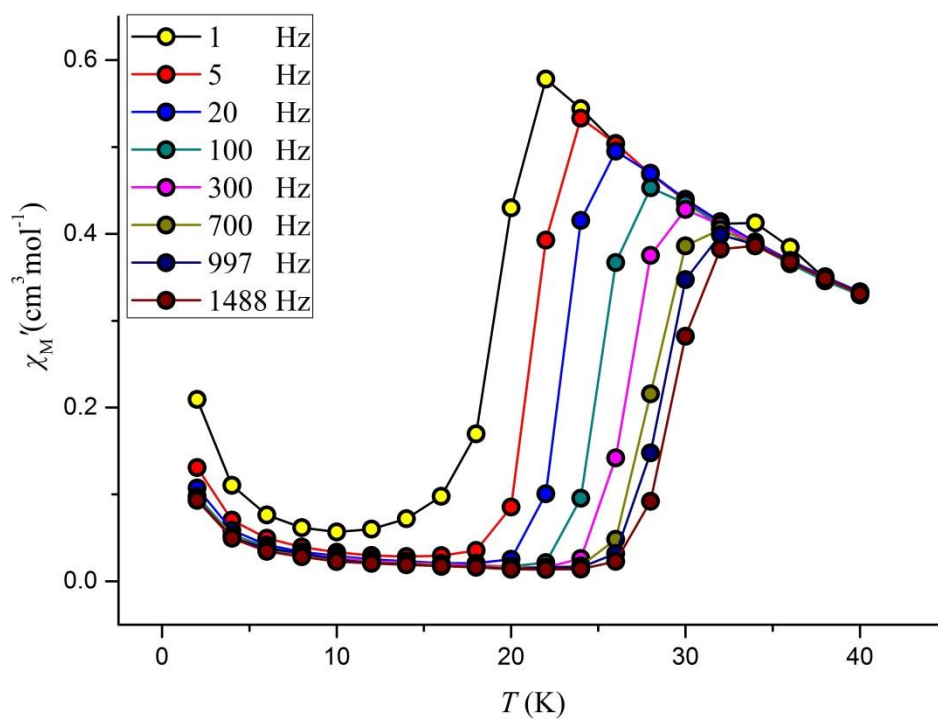

**Fig. S19** Temperature dependence of the in-phase,  $\chi'_M$ , product in zero dc field for **1** with ac frequencies of 1–1488 Hz.

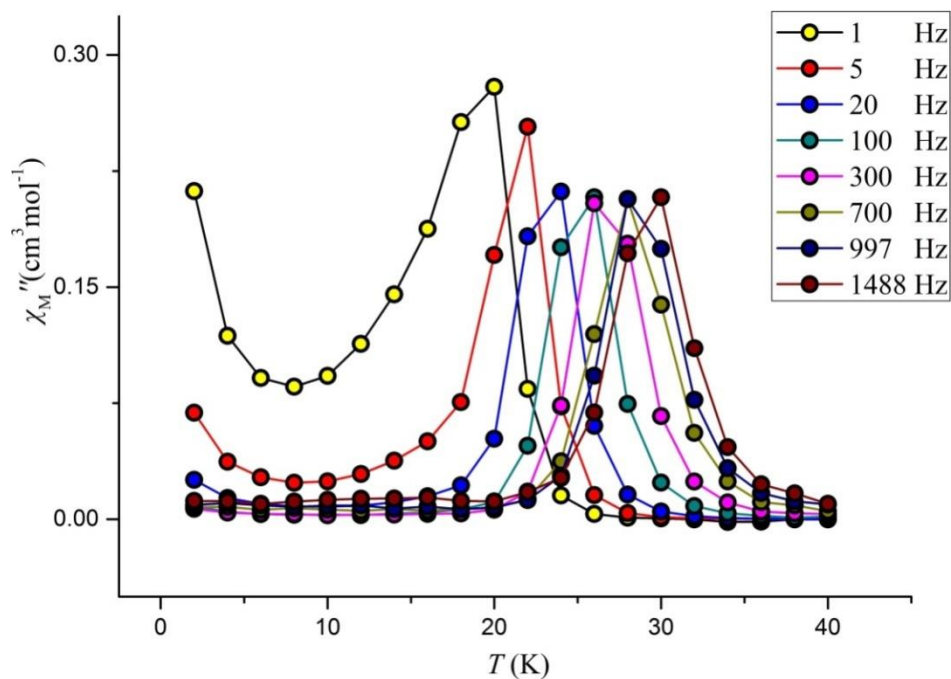

**Fig. S20** Temperature dependence of the out-of-phase,  $\chi''_M$ , product in zero dc field for **1** with ac frequencies of 1–1488 Hz.

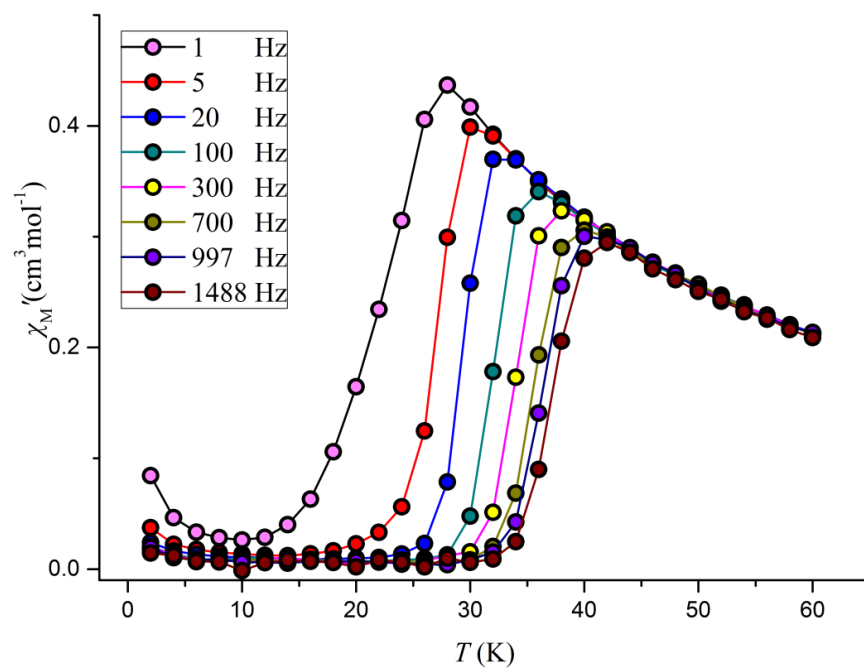

**Fig. S21** Temperature dependence of the in-phase,  $\chi'_M$ , product in zero dc field for **2** with ac frequencies of 1–1488 Hz.

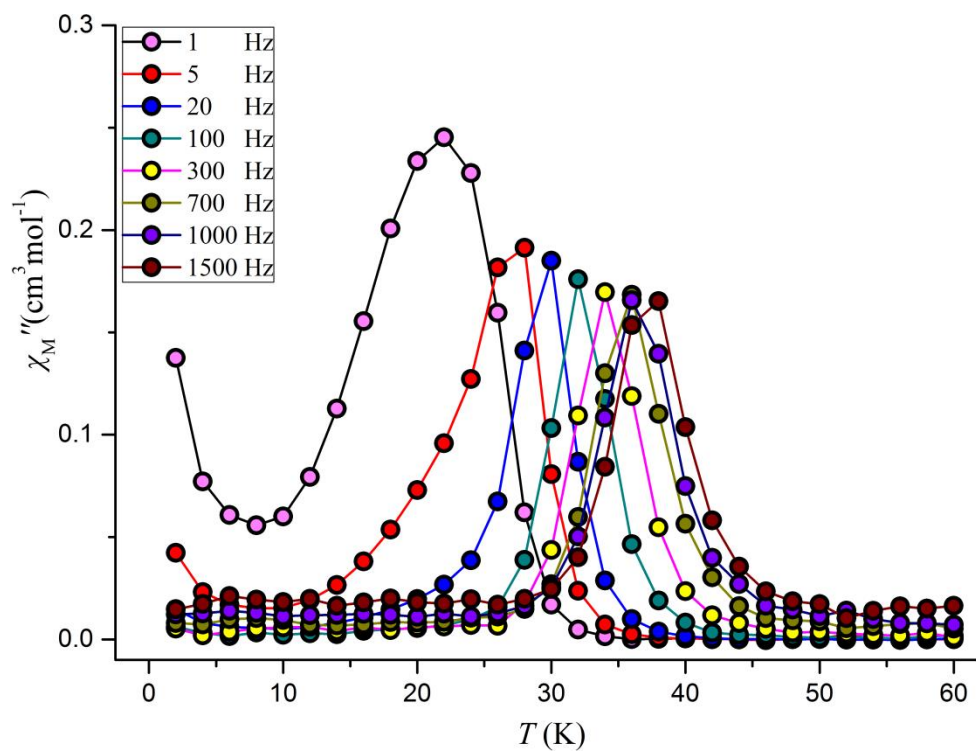

**Fig. S22** Temperature dependence of the out-of-phase,  $\chi''_M$ , product in zero dc field for **2** with ac frequencies of 1–1488 Hz.



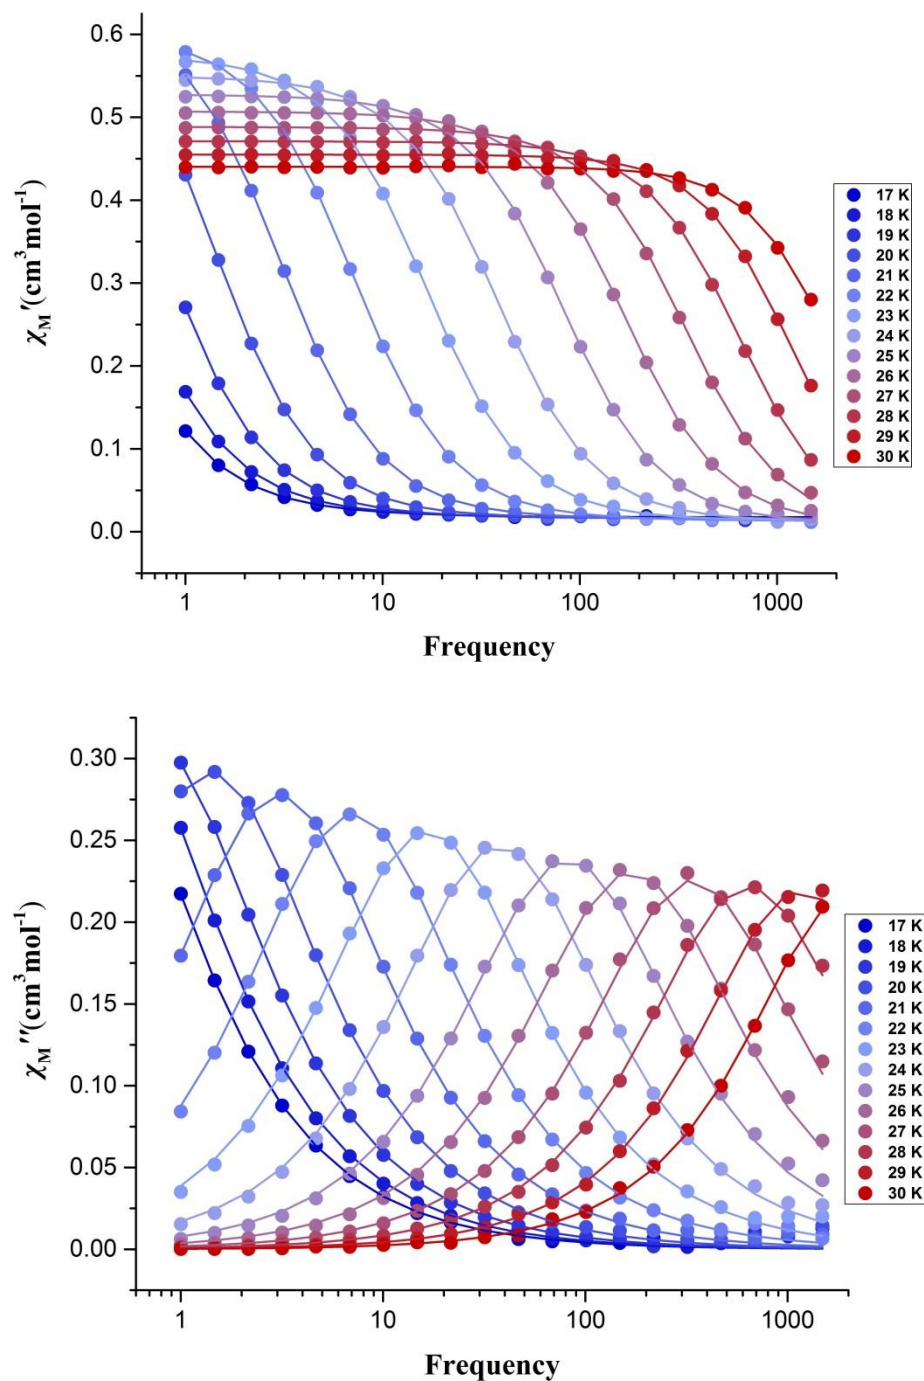

**Fig. S23** (Top) Frequency dependent in-phase and (bottom) out-of-phase susceptibility signals for complex **1** in zero dc field, in the temperature range 17 – 30 K. The solid lines correspond to the best fit.

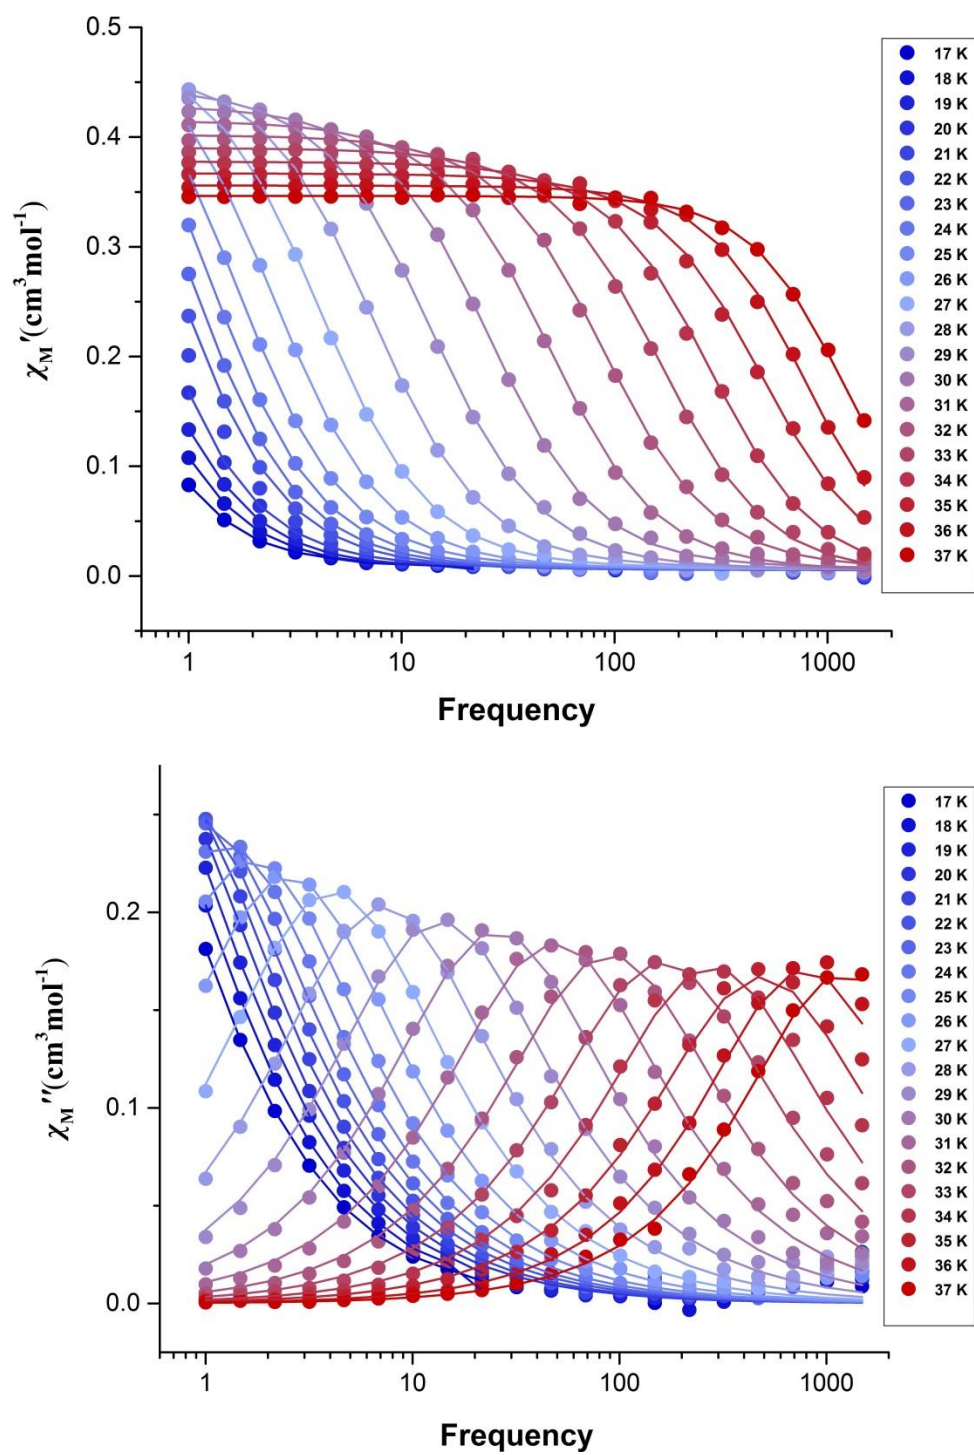

**Fig. S24** (Top) Frequency dependent in-phase and (bottom) out-of-phase susceptibility signals for complex **2** in zero dc field, in the temperature range 17 – 37 K. The solid lines correspond to the best fit.

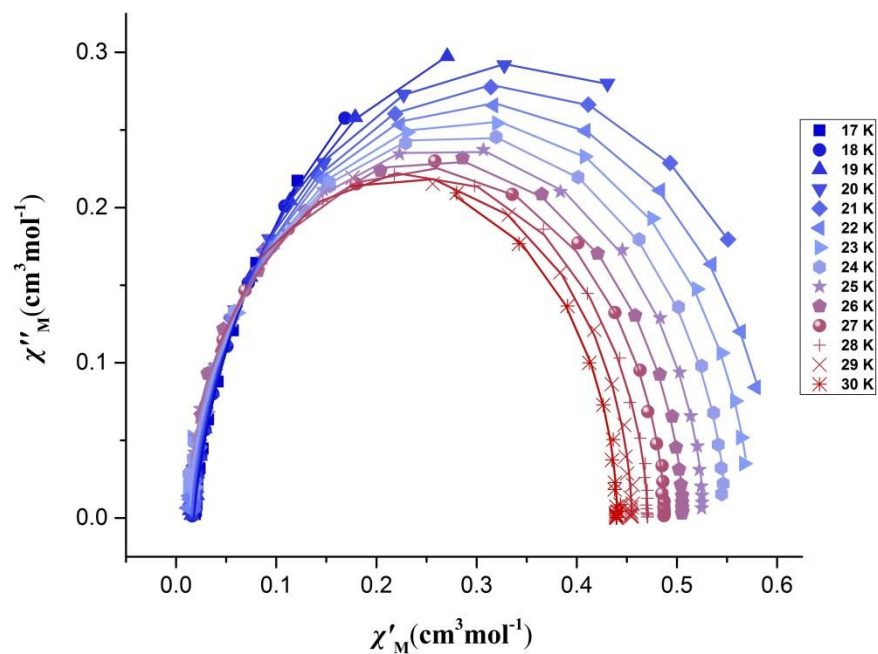

**Fig. S25**  $\chi''_M$  vs  $\chi'_M$  plot of the AC magnetic susceptibility of **1** in zero dc field. The solid lines correspond to the best fit to Debye's law.

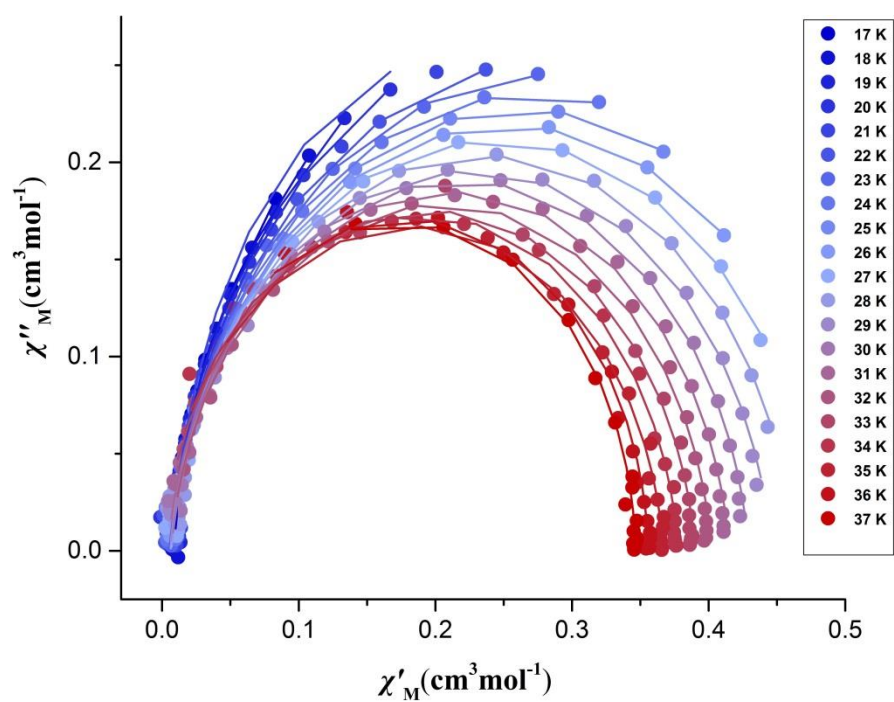

**Fig. S26**  $\chi''_M$  vs  $\chi'_M$  plot of the AC magnetic susceptibility of **2** in zero dc field. The solid lines correspond to the best fit to Debye's law.

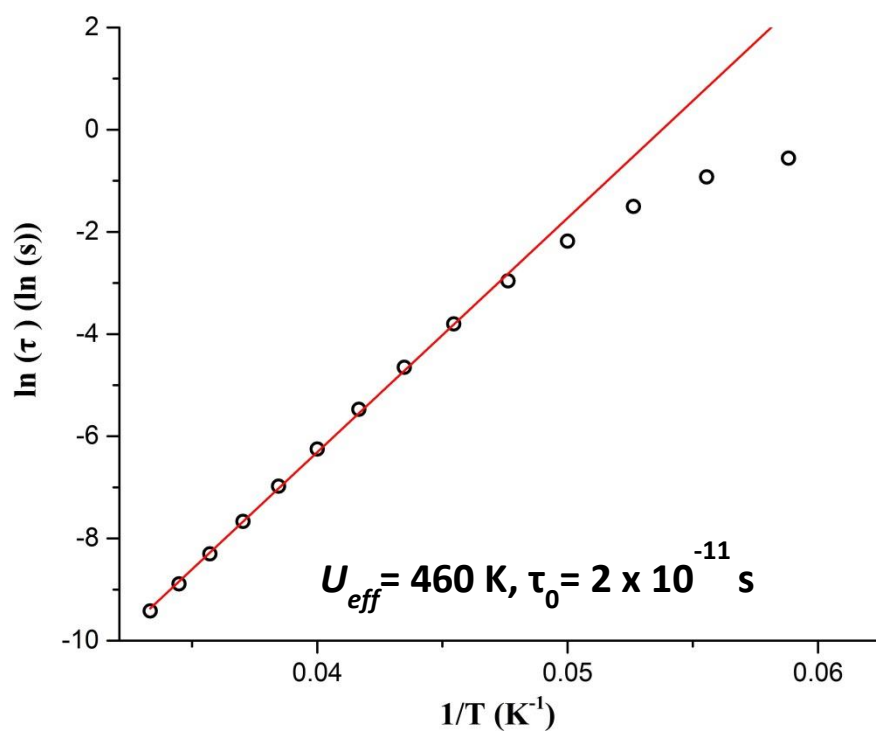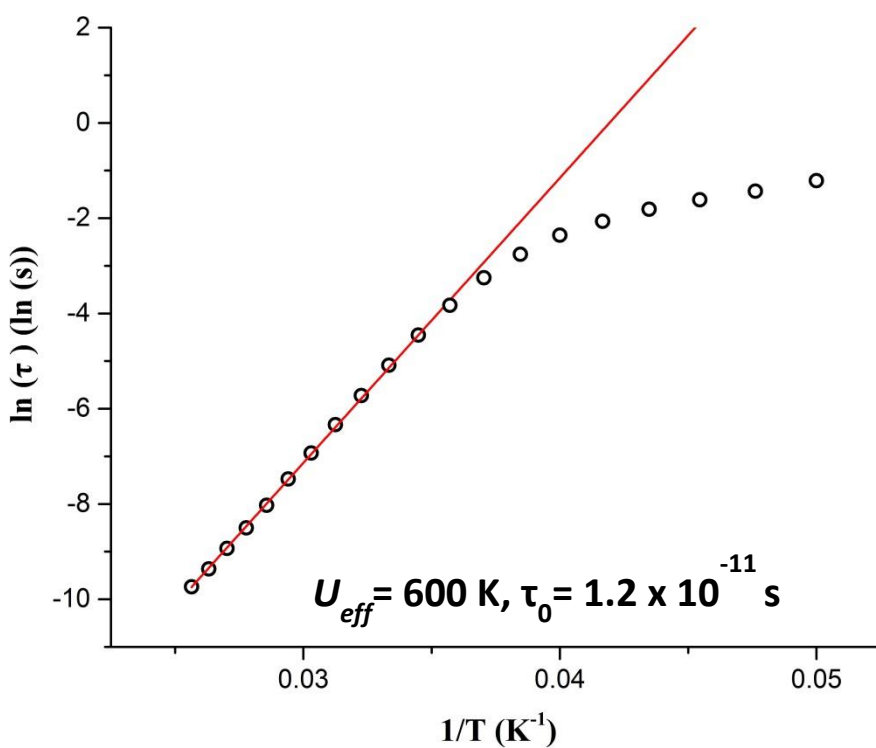

**Fig. S27** Plot of the relaxation time  $\tau(T)$  (logarithmic scale) versus  $T^{-1}$  for **1** (top) and **2** (bottom). The solid red line represents the best fit to the Arrhenius law.

## Computational Details:

All the *ab initio* calculations have been performed using MOLCAS 8.0 code. Employed basis sets are given below.

C.ANO-RCC...3s2p.,  
N.ANO-RCC...3s2p.,  
O.ANO-RCC...4s3p2d1f.,  
H.ANO-RCC...2s.,  
P.ANO-RCC...4s3p.,  
Cl.ANO-RCC...4s3p1d  
I.ANO-RCC...6s5p2d.,  
Dy.ANO-RCC...8s7p5d3f2g1h..

For the  $4f^9$  electronic configuration of Dy(III), the  $^6H_{15/2}$  multiplet is expected to be the ground state. In our first step, we have generated the guess orbitals. Then we have selected seven Dy(III) based starting orbitals to perform the CASSCF calculations. CASSCF calculations have been performed where eleven electrons are in the seven active orbitals with an active space of CAS(9,7). Using this active space first we have computed 21 sextets using the configuration interaction (CI) procedure. After this, we have performed RASSI-SO module to compute the spin-orbit coupled states. After computing these SO states, we have performed the SINGLE\_ANISO code to extract the corresponding g-tensors. Here we have computed the g-tensors for the eight low-lying Kramers Doublets. The Cholesky decomposition for two electron integrals is employed throughout in the calculations to reduce the disk space.<sup>5</sup>

Analysis of qualitative relaxation mechanism: unlike in transition metal based SMMs/SIMs, in majority of lanthanide-based SMMs/SIMs, the thermally assisted magnetic relaxation occurs through TA-QTM (thermally assisted quantum tunneling of magnetization). Quenching TA-QTM at the first excited KD can cause relaxation via higher excited state(s) and increase the magnitude of  $U_{\text{eff}}$  values. Ungur and Chibotaru have proposed a methodology to derive the parameters that control the relaxation mechanism from the *ab initio* computed wave function. This involves calculation of the transition magnetic moment between the degenerate states of lanthanide-based SMMs. For Kramers doublets, the transition magnetic moment and tunneling rate (among the two degenerate states of a doublet) are proportional and the average sum of the transition magnetic moment,  $((|\mu_x|+|\mu_y|+|\mu_z|)/3)$  qualitatively gives the transition probability between the two degenerate doublet states.<sup>6</sup>

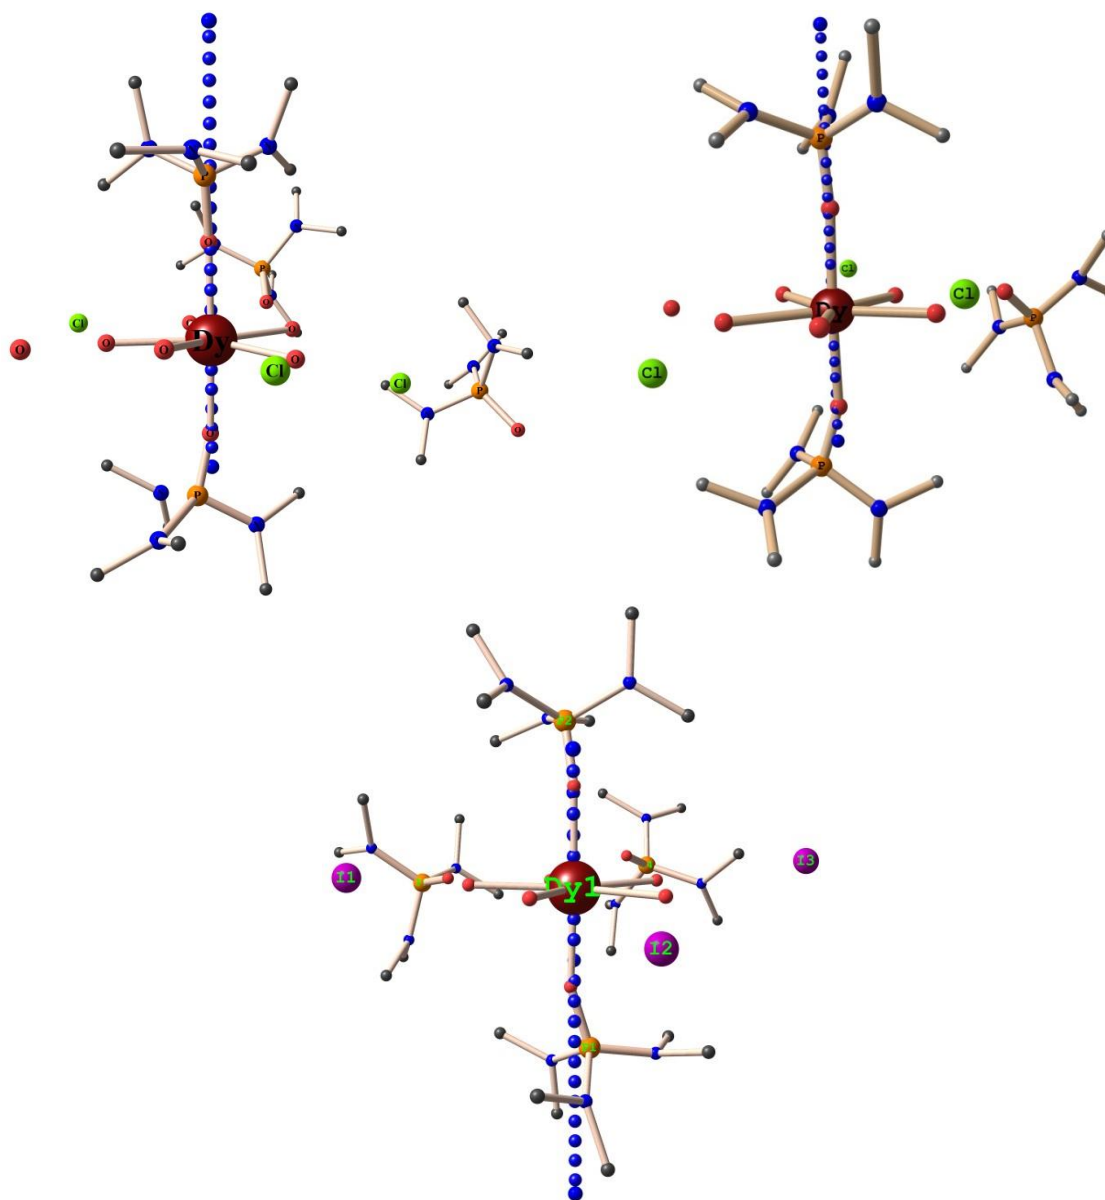

**Fig. S28** *Ab initio* SINGLE\_ANISO computed ground state KD orientations for complex **1** (upper left **1a** and upper right **1b**) and **2** (lower). Complex **1** has two crystallographic units (**1a** and **1b**) and calculations have been performed on both units. The computed  $g_{zz}$  axis for both the ground and first excited states is collinear in complexes **1** and **2** (less than  $2^\circ$ , see Table S6). The angle between the  $g_{zz}$  axis of the ground state KD and the other excited states is important as larger deviation from the ground state suggests a possibility of relaxation via that excited state. If the  $g_{zz}$  angle of the ground state and the first excited state align along the same direction (angle of deviation is zero), that means the  $g_{zz}$  axes are collinear. This collinearity is important for the



relaxation mechanism and collinearity here suggests that the  $g_{zz}$  axis of the two KDs are nearly aligned along the same direction.

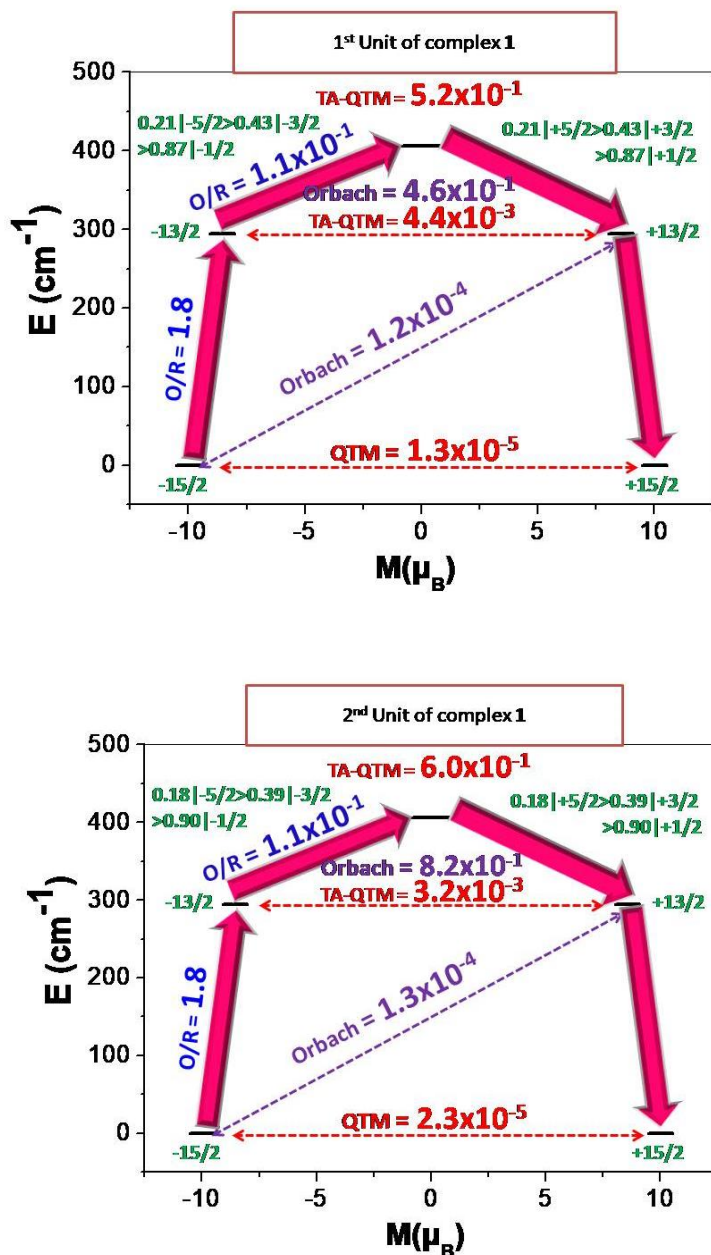

**Fig. S29** *Ab initio* calculated relaxation dynamics for complex 1 (**1a** unit at top and **1b** unit at bottom). Relative energies are given in  $\text{cm}^{-1}$  and the arrows show the connected energy states with the number representing the matrix element of the transverse moment (see text in the manuscript for more details).

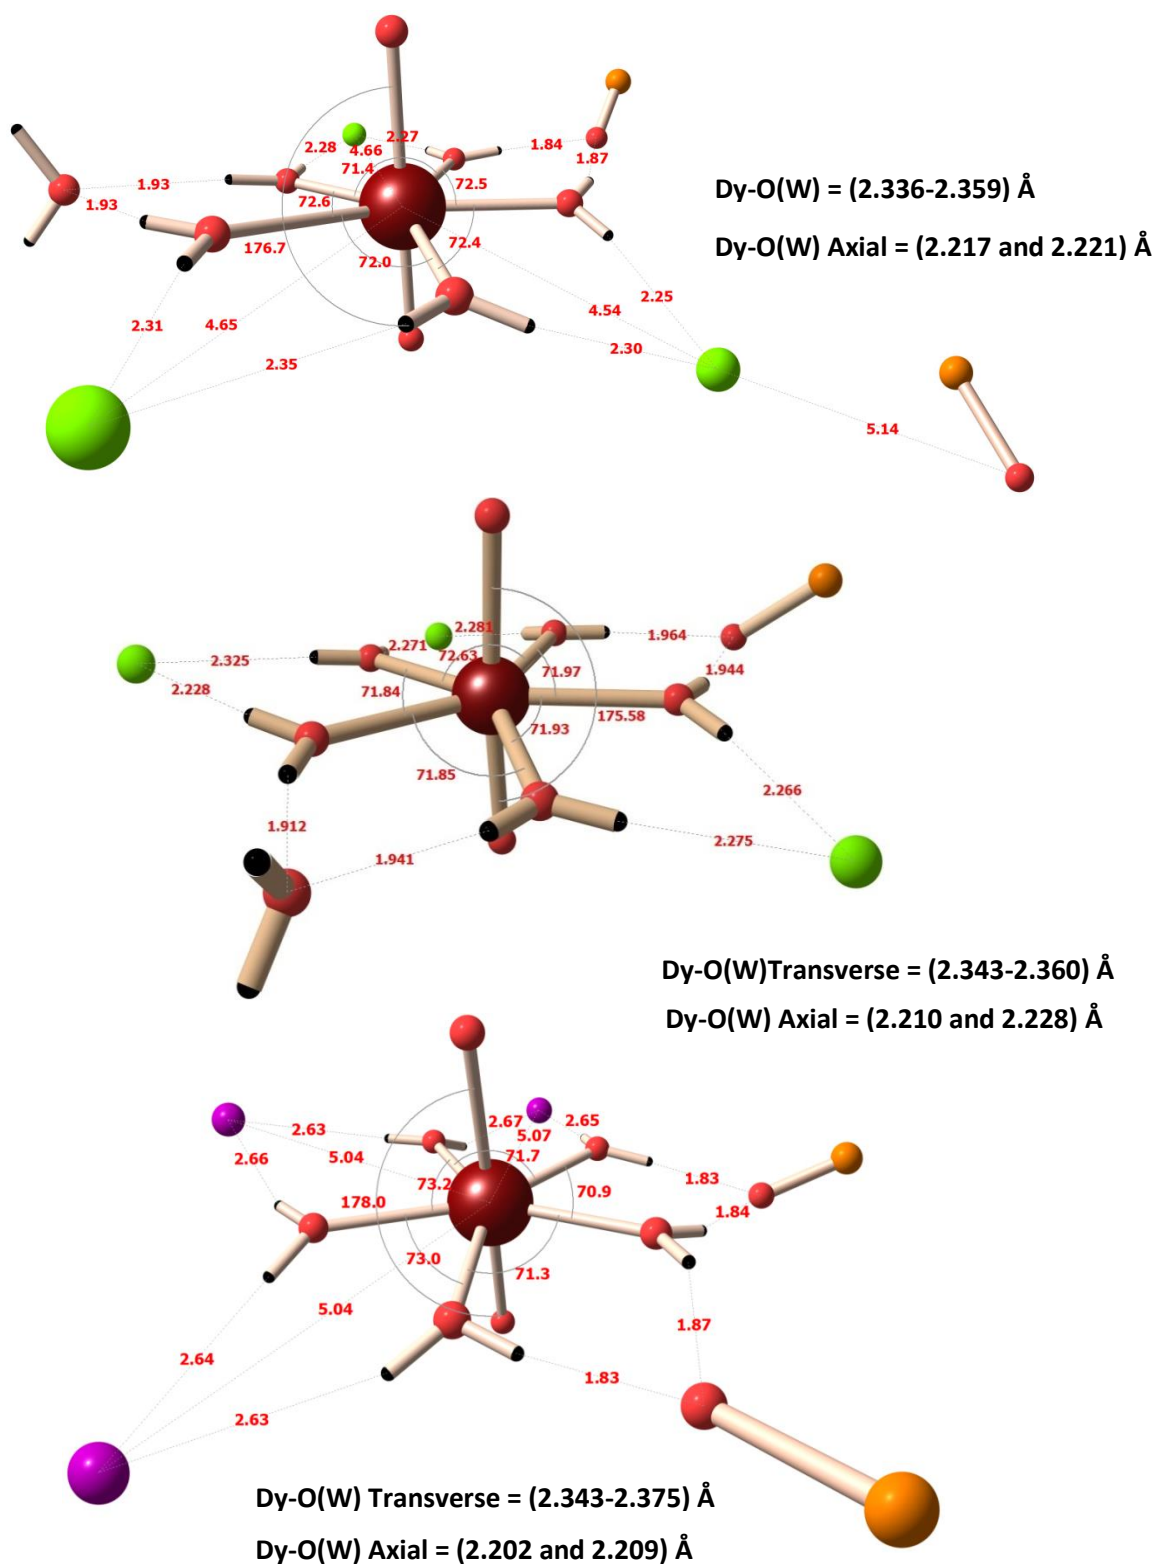

**Fig. S30** Selected structural parameters for **1a** (top), **1b** (middle) and **2** (bottom).



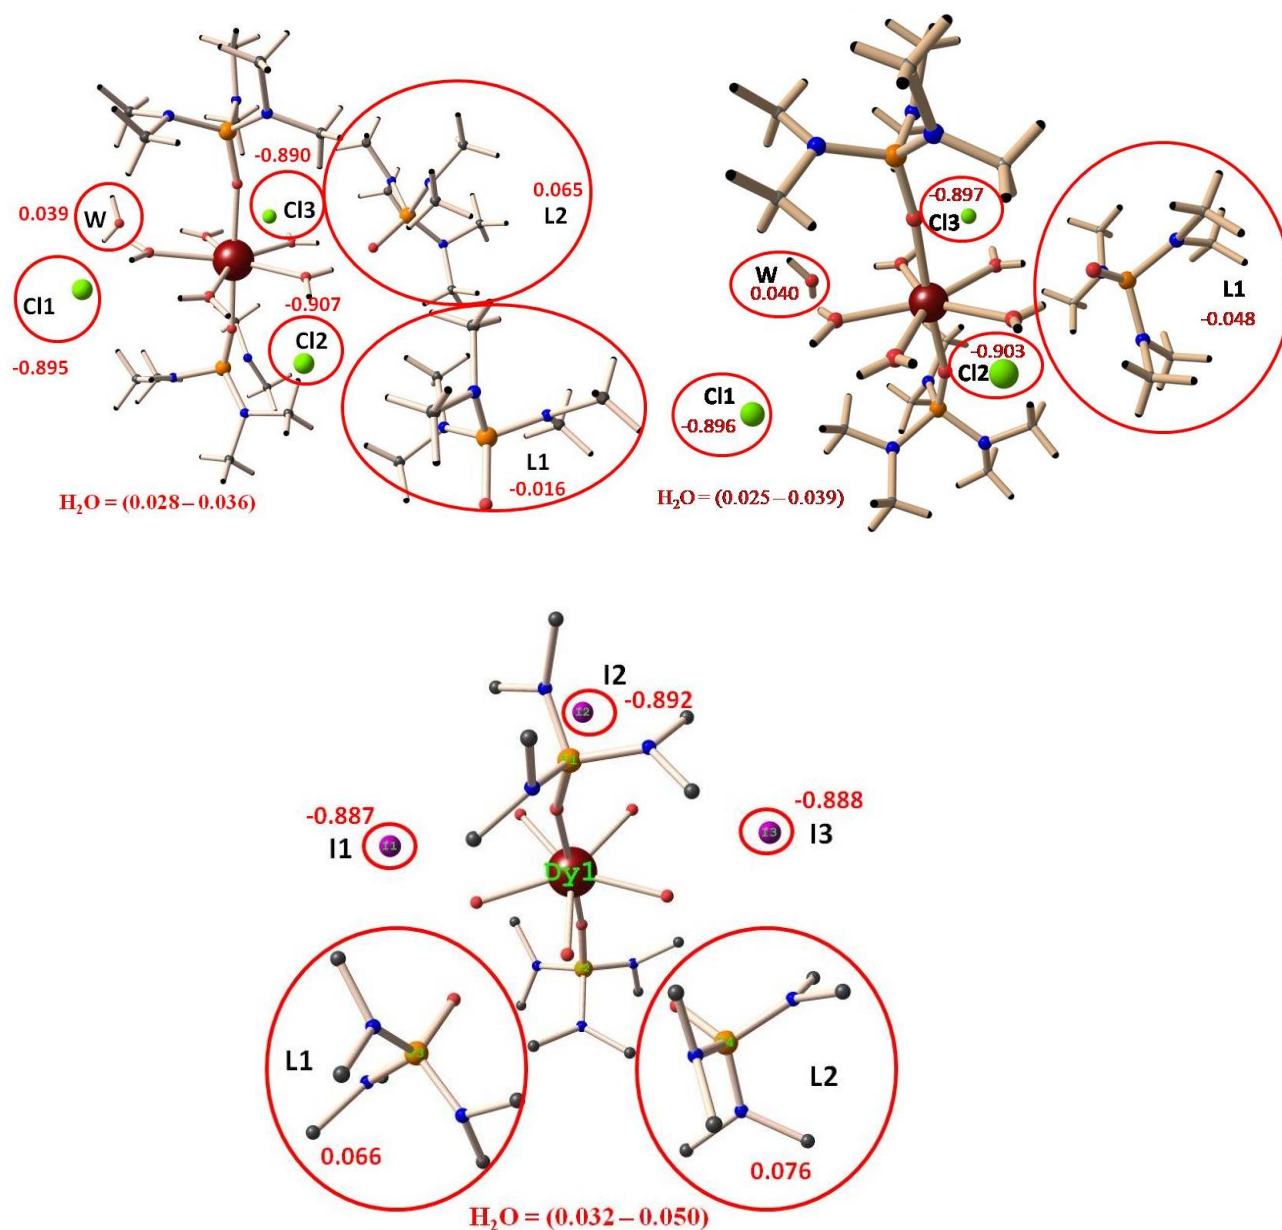

**Fig. S31** *Ab initio* SINGLE\_ANISO computed LoProp charges of fragments for complex **1** (**1a** upper left and **1b** upper right) and **2** (lower). On average, the charges on the  $Cl^-$  ions are found to be higher compared to the  $I^-$  ions, suggesting a larger transverse field contribution by the  $Cl^-$  ions to the Dy(III) ion with respect to the  $I^-$  ions. The LoProp charges are used to partition properties like dipole moments and polarizabilities into atomic and interatomic contributions.<sup>7</sup>

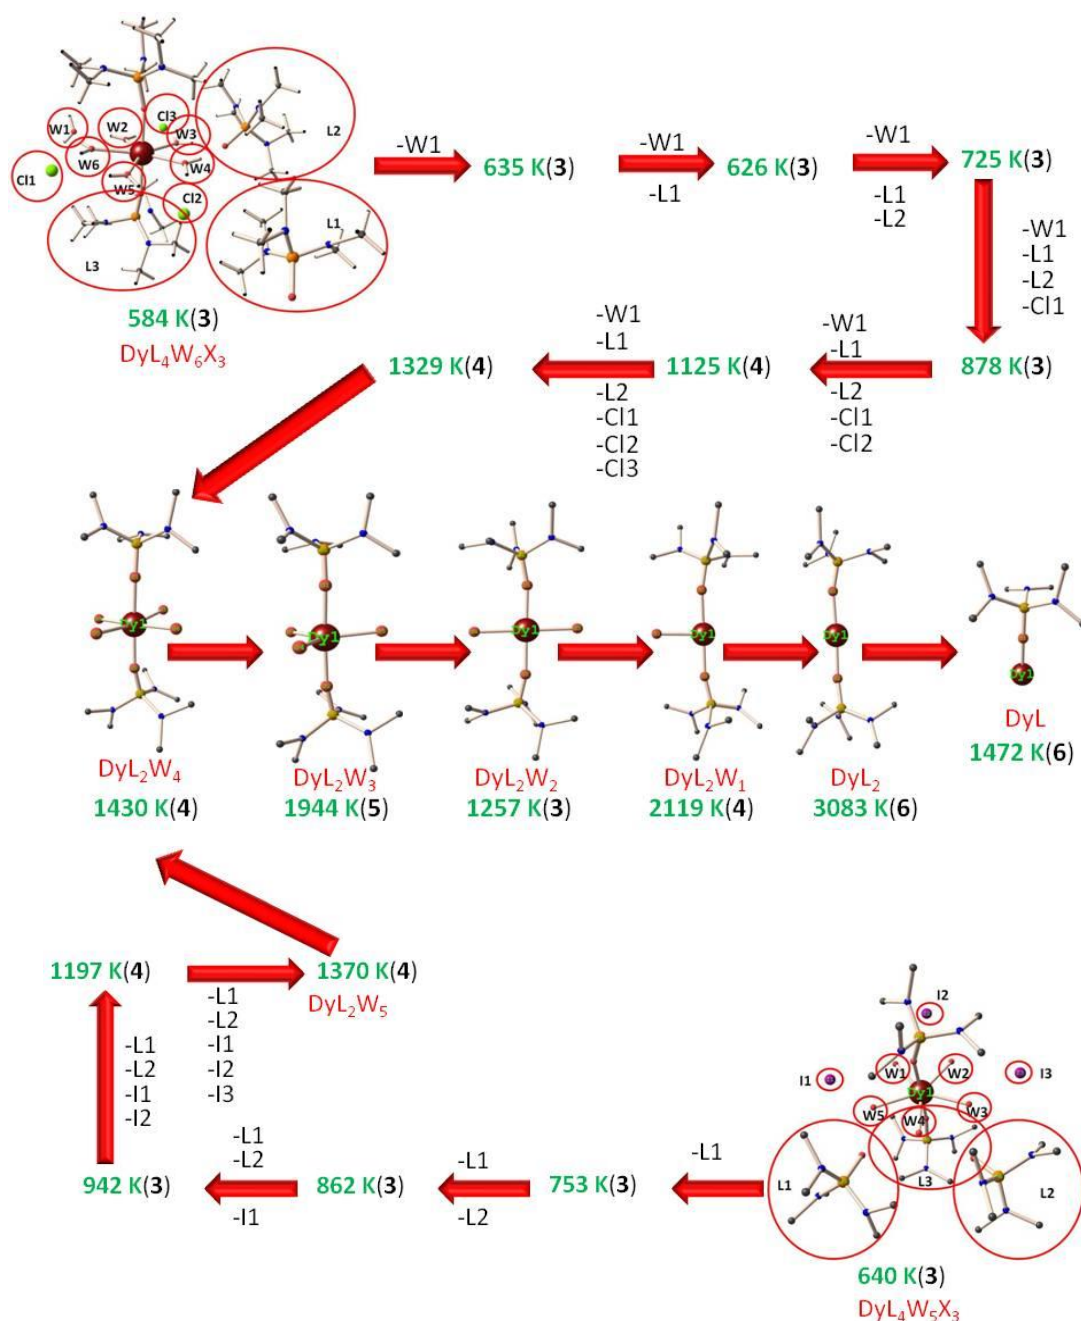

**Fig. S32** *Ab initio* SINGLE\_ANISO computed  $U_{cal}$  values for all the models created by removal of fragments one by one for complexes **1b** and **2**. Green color values show the  $U_{cal}$  value for each model. Numerical number in brackets for each model suggests the excited KD through which relaxation is expected (Ground state KD (1), first excited state KD (2) and so on).

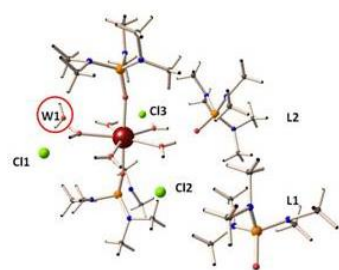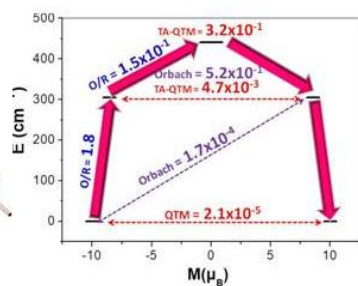

| E cm-1 | gxx   | gyy   | gzz    | Angle |
|--------|-------|-------|--------|-------|
| 0.00   | 0.000 | 0.000 | 19.954 |       |
| 305.07 | 0.012 | 0.016 | 17.056 | 1.6   |
| 440.95 | 0.441 | 1.149 | 18.640 | 92.5  |
| 503.89 | 2.544 | 3.035 | 10.806 | 34.9  |
| 530.86 | 3.276 | 5.195 | 7.243  | 32.2  |
| 578.24 | 7.962 | 4.316 | 0.148  | 109.7 |
| 630.33 | 1.419 | 2.745 | 15.548 | 55.0  |
| 650.98 | 0.160 | 1.391 | 17.107 | 59.6  |

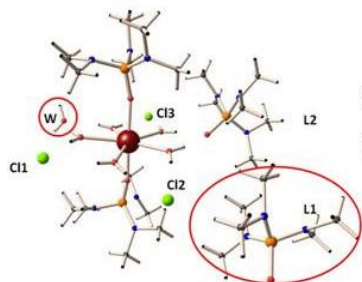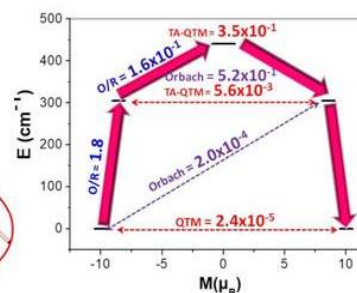

| E cm-1 | gxx   | gyy   | gzz    | Angle |
|--------|-------|-------|--------|-------|
| 0.00   | 0.000 | 0.000 | 19.953 |       |
| 303.10 | 0.014 | 0.019 | 17.053 | 1.6   |
| 435.30 | 0.463 | 1.253 | 18.562 | 92.5  |
| 498.63 | 3.060 | 3.387 | 10.392 | 39.2  |
| 524.42 | 3.258 | 4.516 | 7.866  | 27.8  |
| 571.32 | 0.399 | 3.991 | 7.931  | 22.0  |
| 624.58 | 1.403 | 3.042 | 15.251 | 54.4  |
| 644.27 | 0.059 | 1.491 | 17.047 | 59.3  |

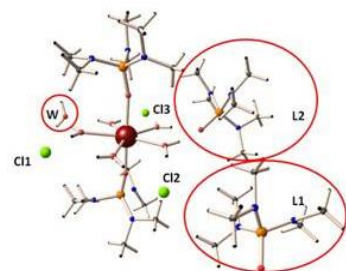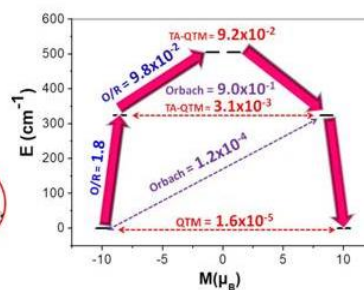

| E cm-1 | gxx   | gyy   | gzz    | Angle |
|--------|-------|-------|--------|-------|
| 0.00   | 0.000 | 0.000 | 19.962 |       |
| 323.97 | 0.008 | 0.010 | 17.063 | 1.4   |
| 504.42 | 0.015 | 0.352 | 18.354 | 95.5  |
| 552.41 | 0.145 | 0.631 | 12.478 | 14.0  |
| 600.28 | 2.555 | 5.266 | 11.031 | 95.9  |
| 641.58 | 2.943 | 4.732 | 8.242  | 26.2  |
| 697.20 | 0.982 | 1.582 | 16.521 | 59.4  |
| 724.35 | 0.039 | 1.135 | 17.847 | 62.7  |

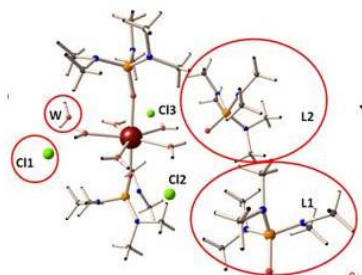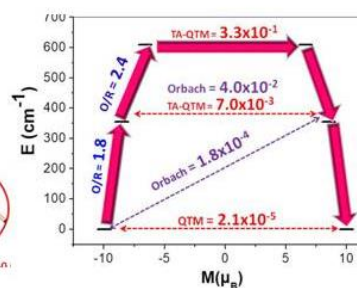

| E cm-1 | gxx   | gyy   | gzz    | Angle |
|--------|-------|-------|--------|-------|
| 0.00   | 0.000 | 0.000 | 19.954 |       |
| 355.39 | 0.020 | 0.022 | 17.068 | 1.0   |
| 610.00 | 0.463 | 1.295 | 13.397 | 8.7   |
| 668.59 | 0.099 | 3.056 | 15.725 | 94.7  |
| 712.44 | 2.405 | 3.512 | 12.284 | 88.9  |
| 755.85 | 7.081 | 5.208 | 0.355  | 73.5  |
| 774.78 | 2.429 | 4.837 | 9.253  | 48.4  |
| 811.52 | 2.049 | 3.967 | 13.485 | 59.0  |

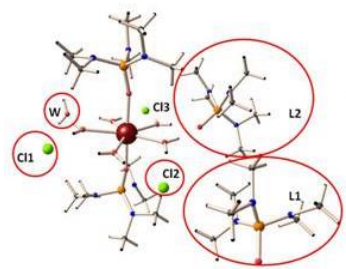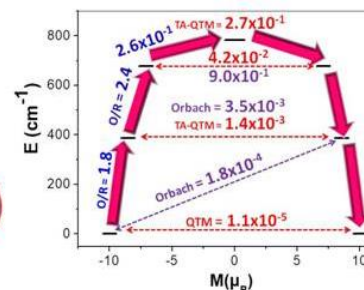

| E cm-1 | gxx   | gyy   | gzz    | Angle |
|--------|-------|-------|--------|-------|
| 0.00   | 0.000 | 0.000 | 19.977 |       |
| 387.92 | 0.004 | 0.004 | 17.082 | 0.6   |
| 676.98 | 0.091 | 0.158 | 14.199 | 2.6   |
| 782.37 | 0.347 | 1.004 | 18.212 | 91.5  |
| 827.81 | 3.554 | 4.306 | 11.002 | 96.1  |
| 857.86 | 1.389 | 3.168 | 10.288 | 60.7  |
| 899.53 | 0.684 | 3.408 | 14.230 | 69.8  |
| 920.36 | 1.313 | 3.773 | 13.138 | 59.2  |

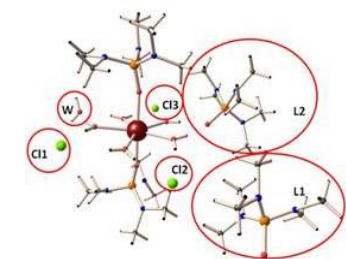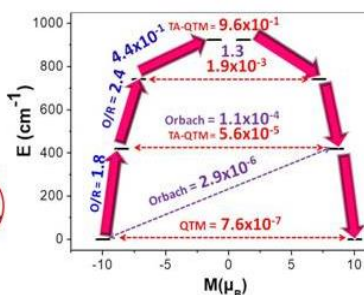

| E cm-1  | gxx   | gyy   | gzz    | Angle |
|---------|-------|-------|--------|-------|
| 0.00    | 0.000 | 0.000 | 19.979 |       |
| 419.84  | 0.000 | 0.000 | 17.073 | 0.4   |
| 740.53  | 0.006 | 0.006 | 14.311 | 0.8   |
| 924.04  | 1.625 | 3.589 | 13.443 | 99.9  |
| 936.79  | 0.947 | 3.766 | 8.338  | 10.9  |
| 962.77  | 5.778 | 4.879 | 2.137  | 67.5  |
| 1001.69 | 0.971 | 3.689 | 8.393  | 40.0  |
| 1013.70 | 1.909 | 2.573 | 11.208 | 40.9  |



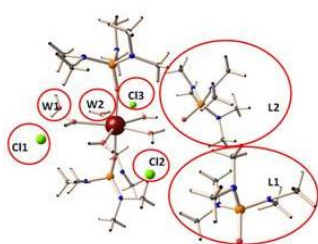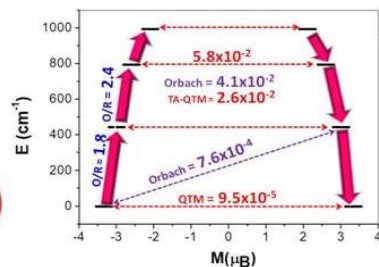

| E cm <sup>-1</sup> | g <sub>xx</sub> | g <sub>yy</sub> | g <sub>zz</sub> | Angle |
|--------------------|-----------------|-----------------|-----------------|-------|
| 0.00               | 0.000           | 0.000           | 19.955          |       |
| 443.11             | 0.076           | 0.078           | 16.915          | 2.5   |
| 794.75             | 0.064           | 0.249           | 13.528          | 6.0   |
| 993.78             | 8.314           | 7.260           | 5.977           | 21.6  |
| 1125.4             | 0.326           | 0.745           | 15.950          | 97.2  |
| 1150.1             | 0.022           | 2.036           | 14.435          | 93.8  |
| 1266.8             | 0.297           | 1.032           | 17.371          | 84.7  |
| 1300.1             | 0.550           | 1.623           | 18.138          | 84.7  |

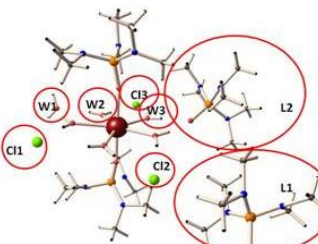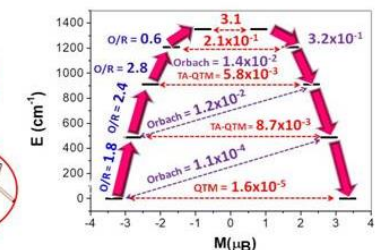

| E cm <sup>-1</sup> | g <sub>xx</sub> | g <sub>yy</sub> | g <sub>zz</sub> | Angle |
|--------------------|-----------------|-----------------|-----------------|-------|
| 0.00               | 0.000           | 0.000           | 19.993          |       |
| 488.8              | 0.026           | 0.026           | 17.042          | 0.7   |
| 910.6              | 0.010           | 0.022           | 14.172          | 1.5   |
| 1210.3             | 0.557           | 0.644           | 10.970          | 3.7   |
| 1351.5             | 9.206           | 8.599           | 4.483           | 7.1   |
| 1403.0             | 0.685           | 3.894           | 15.310          | 89.8  |
| 1430.7             | 1.419           | 2.687           | 9.946           | 90.4  |
| 1464.5             | 1.414           | 4.475           | 13.890          | 82.1  |

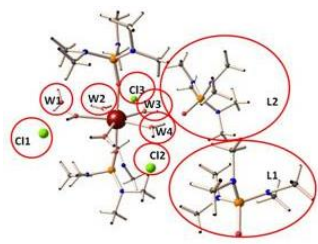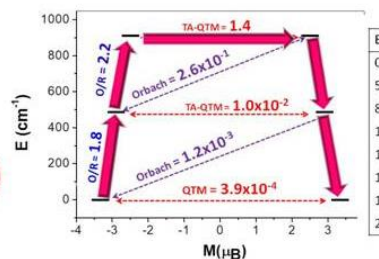

| E cm <sup>-1</sup> | g <sub>xx</sub> | g <sub>yy</sub> | g <sub>zz</sub> | Angle |
|--------------------|-----------------|-----------------|-----------------|-------|
| 0.00               | 0.000           | 0.000           | 19.993          |       |
| 507.9              | 0.025           | 0.036           | 16.759          | 2.8   |
| 874.1              | 1.952           | 4.945           | 11.285          | 25.3  |
| 1006.5             | 7.742           | 6.616           | 1.628           | 8.6   |
| 1250.1             | 1.716           | 2.696           | 11.172          | 90.0  |
| 1603.4             | 0.174           | 0.281           | 14.506          | 90.2  |
| 1993.3             | 0.074           | 0.112           | 17.103          | 90.4  |
| 2208.0             | 0.013           | 0.024           | 19.768          | 90.7  |

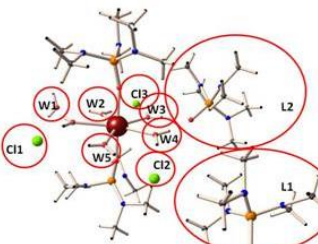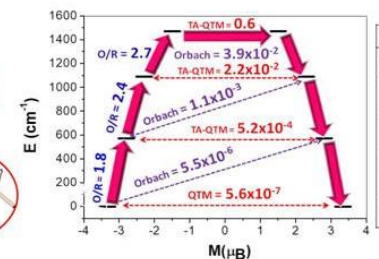

| E cm <sup>-1</sup> | g <sub>xx</sub> | g <sub>yy</sub> | g <sub>zz</sub> | Angle |
|--------------------|-----------------|-----------------|-----------------|-------|
| 0.00               | 0.000           | 0.000           | 19.993          |       |
| 572.7              | 0.001           | 0.002           | 16.941          | 0.5   |
| 1092.9             | 0.059           | 0.070           | 13.961          | 1.3   |
| 1473.0             | 1.104           | 2.127           | 10.200          | 5.4   |
| 1619.8             | 2.891           | 6.571           | 10.526          | 91.7  |
| 1790.8             | 1.111           | 1.993           | 13.026          | 90.2  |
| 2019.3             | 0.022           | 0.137           | 16.670          | 90.3  |
| 2164.6             | 0.065           | 0.101           | 19.673          | 90.5  |

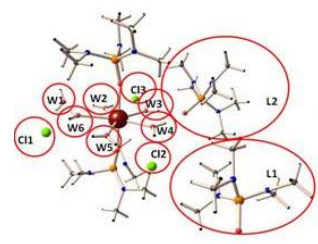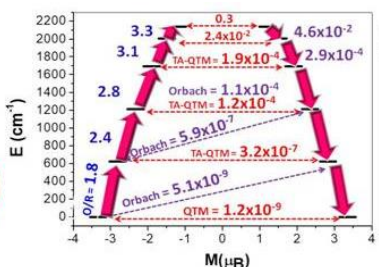

| E cm <sup>-1</sup> | g <sub>xx</sub> | g <sub>yy</sub> | g <sub>zz</sub> | Angle |
|--------------------|-----------------|-----------------|-----------------|-------|
| 0.00               | 0.000           | 0.000           | 20.012          |       |
| 624.7              | 0.000           | 0.000           | 16.976          | 0.2   |
| 1214.2             | 0.000           | 0.000           | 14.069          | 0.2   |
| 1696.4             | 0.000           | 0.001           | 11.406          | 0.0   |
| 2004.9             | 0.070           | 0.073           | 8.958           | 1.1   |
| 2142.9             | 0.666           | 0.906           | 6.488           | 7.6   |
| 2178.2             | 11.532          | 7.895           | 2.118           | 3.0   |
| 2188.9             | 0.516           | 2.256           | 17.768          | 89.1  |

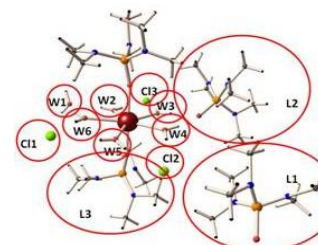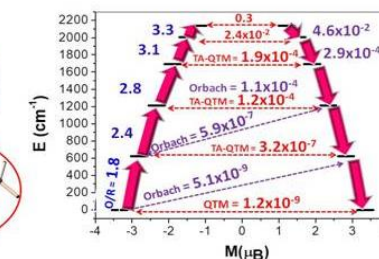

| E cm <sup>-1</sup> | g <sub>xx</sub> | g <sub>yy</sub> | g <sub>zz</sub> | Angle |
|--------------------|-----------------|-----------------|-----------------|-------|
| 0.00               | 0.000           | 0.000           | 20.010          |       |
| 319.3              | 0.000           | 0.000           | 17.178          | 0.7   |
| 590.8              | 0.001           | 0.001           | 14.429          | 1.0   |
| 798.6              | 0.000           | 0.001           | 11.768          | 1.5   |
| 939.3              | 0.045           | 0.047           | 9.162           | 2.7   |
| 1022.7             | 0.865           | 1.016           | 6.542           | 5.4   |
| 1065.4             | 3.605           | 3.932           | 5.281           | 82.4  |
| 1085.0             | 1.068           | 5.671           | 14.872          | 91.0  |

**Fig. S33** *Ab initio* SINGLE\_ANISO computed  $U_{cal}$  values (in  $\text{cm}^{-1}$ ) for all the models created by removal of fragments one by one for complex **1b**. Left: Model molecular structure, Middle: Model relaxation blockade barrier diagram and Right: Table with KDs energy, g tensors and angles of excited KDs with respect to ground state KD. It should be noted that those fragments which are close to the first coordination sphere have a considerable effect on the  $U_{cal}$  value and those which interact with the second coordination sphere have a very small effect on the  $U_{cal}$  values. For example L1 in complex **1b** is weakly interacting with the second coordination sphere resulting in no major change in the  $U_{cal}$  value.

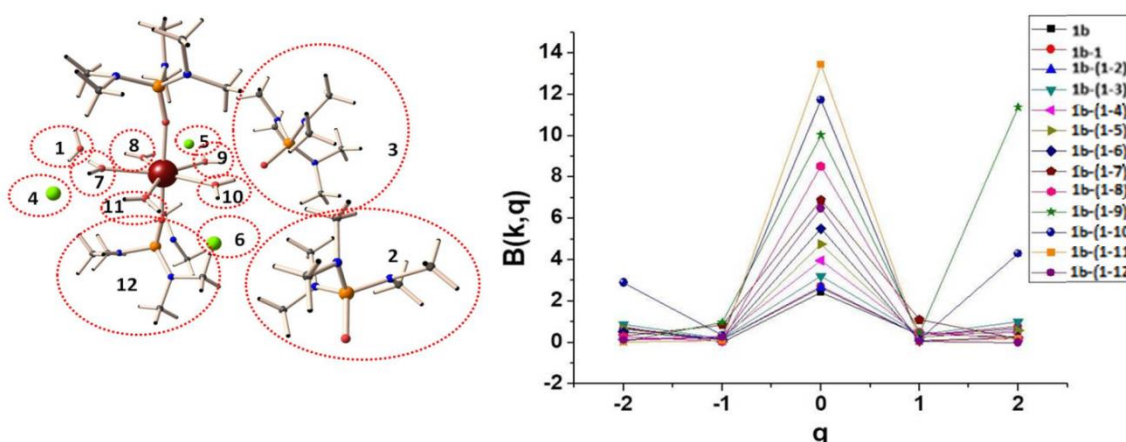

**Fig. S34** *Ab initio* SINGLE\_ANISO computed crystal field parameters for all the models created by removal of fragments one by one for complex **1b** (right). **1b** represents the complete complex and minus numbers after that represent fragment number(s) removed from the complex. Pictorial presentation of sequential removals of fragments (left). Numbers represent the sequence in which fragments are being removed.

## References

1. O. V. Dolomanov et al., *J. Appl. Cryst.*, 2009, **42**, 339.
2. Sheldrick, G. M. (2008). *Acta Cryst. A* **64**, 112–122.
3. Sheldrick, G. M. (2015). *Acta Cryst. A* **71**, 3–8.
4. M. Llunell, D. Casanova, J. Cirera, P. Alemany and S. Alvarez, Shape Program, Version 2.0, 2010
5. a) F. Aquilante, J. Autschbach, K. Carlson Rebecca, F. Chibotaru Liviu, G. Delcey Mickaël, L. De Vico, I. Fdez. Galván, N. Ferré, M. Frutos Luis, L. Gagliardi, M. Garavelli, A. Giussani, E. Hoyer Chad, G. Li Manni, H. Lischka, D. Ma, Å. Malmqvist Per, T. Müller, A. Nenov, M. Olivucci, B. Pedersen Thomas, D. Peng, F. Plasser, B. Pritchard, M. Reiher, I. Rivalta, I. Schapiro, J. Segarra-Martí, M. Stenrup, G. Truhlar Donald, L. Ungur, A. Valentini, S. Vancoillie, V. Veryazov, P. Vysotskiy Victor, O. Weingart, F. Zapata and R. Lindh, *J. Comput. Chem.*, 2015, **37**, 506-541; b) F. Aquilante, L. De Vico, N. Ferré, G. Ghigo, P.-Å. Malmqvist, P. Neogrády, T. B. Pedersen, M. Pitoňák, M. Reiher, B. O. Roos, L. Serrano-Andrés, M. Urban, V. Veryazov and R. Lindh, *J. Comput. Chem.*, 2010, **31**, 224-247; c) J. A. Duncan, *J. Am. Chem. Soc.*, 2009, **131**, 2416-2416; d) V. Veryazov, P. O. Widmark, L. Serrano-Andrés, R. Lindh and O. Roos Björn, *Int. J. Quantum Chem.*, 2004, **100**, 626-635; e) G. Karlström, R. Lindh, P.-Å. Malmqvist, B. O. Roos, U. Ryde, V. Veryazov, P.-O. Widmark, M. Cossi, B. Schimmelpfennig, P. Neogrady and L. Seijo, *Comput. Mater. Sci.*, 2003, **28**, 222-239; f) L. F. Chibotaru and L. Ungur, *J. Chem. Phys.*, 2012, **137**, 064112; g) F. Habib, R. Luca Oana, V. Vieru, M. Shiddiq, I. Korobkov, I. Gorelsky Serge, K. Takase Michael, F. Chibotaru Liviu, S. Hill, H. Crabtree Robert and M. Murugesu, *Angew. Chem. Int. Ed.*, 2013, **52**, 11290-11293; h) S. K. Langley, L. Ungur, N. F. Chilton, B. Moubaraki, L. F. Chibotaru and K. S. Murray, *Inorg. Chem.*, 2014, **53**, 4303-4315. I) B. O. Roos, R. Lindh, P.-Å. Malmqvist, V. Veryazov, P.-O. Widmark and A. C. Borin, *J. Phys. Chem. A* 2008, **112**, 11431-11435.
6. L. Ungur, M. Thewissen, J. P. Costes, W. Wernsdorfer and L. F. Chibotaru, *Inorg. Chem.*, 2013, **52**, 6328.
7. L. Gagliardi, R. Lindh and G. Karlström, *J. Chem. Phys.*, 2004, **121**, 4494-4500.
